# Supplementary material
Source: Royal Society of Chemistry journal article supplement (doi:10.1039/d5mh02406d)
Supplement: d5mh02406d1.pdf [file d5mh02406d1.pdf]

## Supporting Information

### **One System, Three Functions: An Electroactive Reconfigurable Organic Receptor for Adaptive Binding, Information Encoding, and Metal-Free Oxidation**

Logeshwari Seethapathy,<sup>a</sup> Rohith M.,<sup>a</sup> Chinmoy K. Hazra,<sup>b</sup> Jayanta Samanta,<sup>a</sup> Susnata Pramanik<sup>a</sup> and Rajorshi Das<sup>\*a</sup>

<sup>a</sup>Department of Chemistry, College of Engineering and Technology, SRM Institute of Science and Technology, Kattankulathur, Chennai - 603203, India.

<sup>b</sup>Department of Chemistry, Indian Institute of Technology Delhi, Hauz Khas, South Delhi – 110016, India

\*Email: [rajorshd@srmist.edu.in](mailto:rajorshd@srmist.edu.in), [rajorika@gmail.com](mailto:rajorika@gmail.com).

## Table of Contents

|                                    |     |
|------------------------------------|-----|
| 1. General Considerations          | S3  |
| 2. Synthesis and Characterizations | S3  |
| 3. NMR Spectra                     | S7  |
| 4. ESI-MS Spectra                  | S12 |
| 5. X-ray Crystallographic Studies  | S13 |
| 6. Electrochemical studies         | S20 |
| 7. Binding constant studies        | S21 |
| 8. UV-vis Spectrum                 | S26 |
| 9. Theoretical Calculations        | S27 |
| 10. References                     | S31 |

## 1. General Considerations

All the reactions and the host-guest studies otherwise specified were performed under aerobic conditions. Starting materials were purchased from the standard commercial sources and used without further purification. Absolute solvents were prepared by distillation under a dinitrogen atmosphere prior to use for the reactions. NMR spectra were recorded at ambient temperature with Varian NMRS-500 and MR-400 spectrometers operating at 500 and 400 MHz, respectively, for  $^1\text{H}$  and  $^{13}\text{C}\{^1\text{H}\}$  NMR. High-resolution (HR) electrospray ionisation (ESI) mass spectra were obtained with a Bruker Daltonics microTOF time-of-flight mass spectrometer using an Apollo<sup>TM</sup> “ion funnel” ESI source. Mass calibration was performed immediately prior to the measurement to ensure accuracy. Solid-state UV–vis Spectra and IR spectra were obtained with a Shimadzu, UV 3600 Plus and Shimadzu, IR Tracker 100 spectrometers, respectively. Single crystals were mounted on a Bruker D8 Quest X-ray diffractometer, and the data were analysed by Apex3 software suite and further refined with Olex 2 programme.

## 2. Synthesis and characterizations

The tricationic 2,4,6-tri(4-ethylpyridyl)-1,3,5-triazinium hexafluorophosphate **1**(PF<sub>6</sub>)<sub>3</sub> was synthesized using the reaction scheme as depicted in Scheme S1.

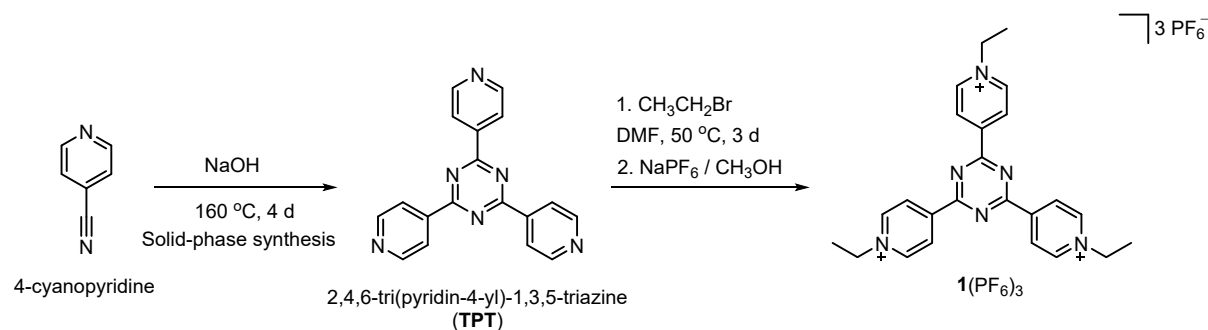

**Scheme S1.** Synthesis of high-valent open system **1**(PF<sub>6</sub>)<sub>3</sub>.

### 2.1 Synthesis of 2,4,6-tri(4-pyridyl)-1,3,5-triazine (TPT)

To a 100 mL round bottom flask, 4-cyanopyridine (25 g, 240.384 mmol) and grounded sodium hydroxide (20 g, 500 mmol) were added. After fitting a condenser, the mixture was heated to 160 °C for 4 days. The sublimated 4-cyanopyridine was scratched down with a spatula periodically. After 4 days, the reaction mixture was cooled down to room temperature and placed on an ice bath. The alkaline mixture was

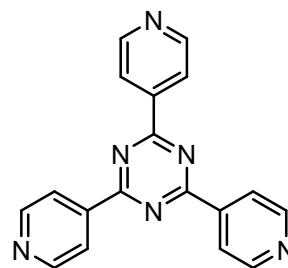

neutralized with 4N hydrochloric acid which gave a white precipitate. After filtration, the white precipitate was separated. The colourless filtrate was treated with ammonium hydroxide to precipitate the rest of the dissolved TPT from the solution, which was again filtered out. The white products were combined and evaporated to dryness under vacuum.

**Yield:** 21 g (84%, 67.234 mmol).

The NMR and ESI-MS data match with the reported literature.<sup>[1]</sup>

## 2.2 Synthesis of 2,4,6-tri(4-ethylpyridyl)-1,3,5-triazinium hexafluorophosphate 1(PF<sub>6</sub>)<sub>3</sub>

A mixture of 1 equivalent of TPT (2 g, 6.403 mmol) and 3.5 equivalent of ethyl bromide (1.7 mL, 22.4 mmol) was suspended in dry DMF (10 mL). The reaction mixture was heated under reflux at 45 °C and stirred for overnight. After 16 h, excess ethyl bromide (0.5 mL) was added, and the reaction mixture was heated under stirring at 60 °C and continued to another 2 days. The reaction mixture was cooled down to room temperature, which led to the

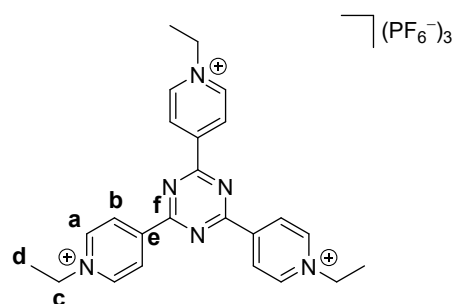

precipitation of a yellow coloured solid. The solid residue was washed with diethyl ether (3 x 5 mL) to remove excess ethyl bromide. After the removal of excess solvent, the residue was completely dissolved in methanol to obtain a clear saturated solution. 3.5 Equivalents of KPF<sub>6</sub> (4 g, 22.4 mmol) were added which gave an immediate formation of 2,4,6-tri(4-ethylpyridyl)-1,3,5-triazinium hexafluorophosphate 1(PF<sub>6</sub>)<sub>3</sub> as a white solid. The excess KPF<sub>6</sub> salt was removed by washing the white solid with water (3 x 5 mL). 1(PF<sub>6</sub>)<sub>3</sub> was isolated as a white solid and dried under vacuum.

**Yield:** 1.925 g (36%, 2.308 mmol).

**Yield:** 296 mg (55%, 0.355 mmol).

**<sup>1</sup>H NMR** (DMSO-*d*<sub>6</sub>):  $\delta$  (ppm) = 9.52 (br, 6H, H<sub>a</sub>), 9.48 (br, 6H, H<sub>b</sub>), 4.84 (br, 6H, H<sub>c</sub>), 1.68 (s, 9H, H<sub>d</sub>).

**<sup>13</sup>C{<sup>1</sup>H} NMR** (DMSO-*d*<sub>6</sub>):  $\delta$  (ppm) = 169.0 (C<sub>a</sub>), 148.5 (C<sub>b</sub>), 146.2 (C<sub>f</sub>), 127.1 (C<sub>e</sub>), 57.1 (C<sub>c</sub>), 16.5 (C<sub>d</sub>).

**HR-ESI MS:**  $m/z$  = 689.1559 for [1(PF<sub>6</sub>)<sub>2</sub>]<sup>+</sup> (calcd  $m/z$  = 689.1580 for C<sub>24</sub>H<sub>27</sub>F<sub>12</sub>P<sub>2</sub>N<sub>6</sub>).

**UV-vis** (solid state, nm):  $\lambda$  = 233, 300.

**IR** (ATR, cm<sup>-1</sup>):  $\nu$  = 2966 (w), 2882 (w), 1660 (w), 1545 (m), 1387 (m), 1037 (s), 855 (w), 576 (s).

### **2.3 Synthesis of the co-crystals of 2,4,6-tri(4-ethylpyridyl)-1,3,5-triazinium hexafluorophosphate $1(\text{PF}_6)_3$ with anthracene [ $1(\text{PF}_6)_3 \cdot \text{anthracene}$ ]**

Co-crystals of  $1(\text{PF}_6)_3$  with anthracene [ $1(\text{PF}_6)_3 \cdot \text{anthracene}$ ] were prepared by slow evaporation method. To a 5 mL vial,  $1(\text{PF}_6)_3$  (10 mg, 0.0120 mmol) was dissolved in 1 mL of acetonitrile. To this, anthracene (3.2 mg, 0.0180 mmol) was added into the solution. Immediate purple colour change was observed. The mixture was stirred with a sonicator until the solution became homogeneous. Subsequently, the solution was kept at rest to allow the solvent to slowly evaporate under ambient temperature. Purple coloured crystals were formed after 4 days at the bottom of the vial. The crystals were isolated and dried.

**Yield:** 8 mg (66 %, 0.0079 mmol).

### **2.4 Synthesis of the co-crystals of 2,4,6-tri(4-ethylpyridyl)-1,3,5-triazinium hexafluorophosphate $1(\text{PF}_6)_3$ with pyrene [ $1(\text{PF}_6)_3 \cdot \text{pyrene}$ ]**

Co-crystals of  $1(\text{PF}_6)_3$  with pyrene [ $1(\text{PF}_6)_3 \cdot \text{Pyrene}$ ] were prepared by slow evaporation method. To a 5 mL vial,  $1(\text{PF}_6)_3$  (10 mg, 0.0120 mmol) was dissolved in 1 mL of acetonitrile. To this, pyrene (3.64 mg, 0.0180 mmol) was added into the solution. Immediate vibrant red colour change was observed. The solution mixture was stirred with a sonicator until the solution became homogeneous. Subsequently, the solution was kept at rest to allow the solvent to slowly evaporate under room temperature. Dark brown co-crystals were formed after 3-4 days at the bottom of the vial. The crystals were isolated and dried.

**Yield:** 9 mg (72.4%, 0.0087 mmol).

### **2.5 Synthesis of the co-crystals of 2,4,6-tri(4-ethylpyridyl)-1,3,5-triazinium hexafluorophosphate $1(\text{PF}_6)_3$ with phenanthrene [ $1(\text{PF}_6)_3 \cdot \text{phenanthrene}$ ]**

Co-crystals of  $1(\text{PF}_6)_3$  and phenanthrene [ $1(\text{PF}_6)_3 \cdot \text{phenanthrene}$ ] were prepared following a similar method elaborated in 3.1 section. To a 5 mL vial,  $1(\text{PF}_6)_3$  (10 mg, 0.0120 mmol) was dissolved in 1 mL of acetonitrile. To this, phenanthrene (3.2 mg, 0.0180 mmol) was added into the solution. Immediate reddish orange colour change was observed. The mixture was stirred with a sonicator until the solution became homogeneous. Subsequently, the solution was kept at rest to allow the solvent to slowly evaporate under ambient temperature. After 4 days, orange-red crystals of  $1(\text{PF}_6)_3 \cdot \text{phenanthrene}$  were obtained at the bottom of the vial.

**Yield:** 7.3 mg (60 %, 0.0072 mmol).

### **2.6 Synthesis of the co-crystals of 2,4,6-tri(4-ethylpyridyl)-1,3,5-triazinium hexafluorophosphate $1(\text{PF}_6)_3$ with naphthalene [ $1(\text{PF}_6)_3 \cdot \text{naphthalene}$ ]**

Co-crystals of  $1(\text{PF}_6)_3$  and naphthalene [ $1(\text{PF}_6)_3 \cdot \text{naphthalene}$ ] were prepared following a similar method elaborated in 3.1 section. To a 5 mL vial,  $1(\text{PF}_6)_3$  (10 mg, 0.0120 mmol) was dissolved in 1 mL of acetonitrile. To this, naphthalene (2.3 mg, 0.0180 mmol) was added into the solution. Immediately the solution colour changed to yellow. The mixture was stirred with a sonicator until the solution became homogeneous. Subsequently, the solution was kept at rest to allow the solvent to slowly evaporate under ambient temperature. After 4-5 days, yellow crystals of  $1(\text{PF}_6)_3 \cdot \text{naphthalene}$  were obtained at the bottom of the vial. The crystals were collected and dried.

**Yield:** 7 mg (61%, 0.0073 mmol).

### **2.7 Synthesis of the co-crystals of 2,4,6-tri(4-ethylpyridyl)-1,3,5-triazinium hexafluorophosphate $1(\text{PF}_6)_3$ with perylene [ $1(\text{PF}_6)_3 \cdot \text{perylene}$ ]**

Co-crystals of  $1(\text{PF}_6)_3$  and perylene [ $1(\text{PF}_6)_3 \cdot \text{perylene}$ ] were prepared following a similar method elaborated in 3.1 section. To a 5 mL vial,  $1(\text{PF}_6)_3$  (10 mg, 0.0120 mmol) was dissolved in 2 mL of acetonitrile. To this, perylene (4.54 mg, 0.0180 mmol) was added into the solution. Immediately the solution colour changed to green. The mixture was stirred with a sonicator until the solution became homogeneous. Subsequently, the solution was kept at rest to allow the solvent to slowly evaporate under ambient temperature. After a week, bright green crystals of  $1(\text{PF}_6)_3 \cdot \text{perylene}$  were obtained. The crystals were collected and dried.

**Yield:** 9.6 mg (74 %, 0.0088 mmol).

### **2.8 Synthesis of the co-crystals of 2,4,6-tri(4-ethylpyridyl)-1,3,5-triazinium hexafluorophosphate $1(\text{PF}_6)_3$ with coronene [ $1(\text{PF}_6)_3 \cdot \text{coronene}$ ]**

Co-crystals of  $1(\text{PF}_6)_3 \cdot \text{coronene}$  were prepared following a similar method elaborated in 3.1 section. To a 5 mL vial,  $1(\text{PF}_6)_3$  (10 mg, 0.0120 mmol) was dissolved in 2 mL of acetonitrile. To this, coronene (5.4 mg, 0.0180 mmol) was added into the solution. Immediately the solution colour changed to purple-pink. The mixture was stirred with a sonicator until the solution became homogeneous. Subsequently, the solution was allowed to rest for a week to slowly evaporate the solvent under ambient temperature. After two weeks, bright green crystals of  $1(\text{PF}_6)_3 \cdot \text{coronene}$  were obtained. The crystals were collected and dried.

Yield: 5 mg (36%, 0.0044 mmol).

### 3.1 NMR Spectra

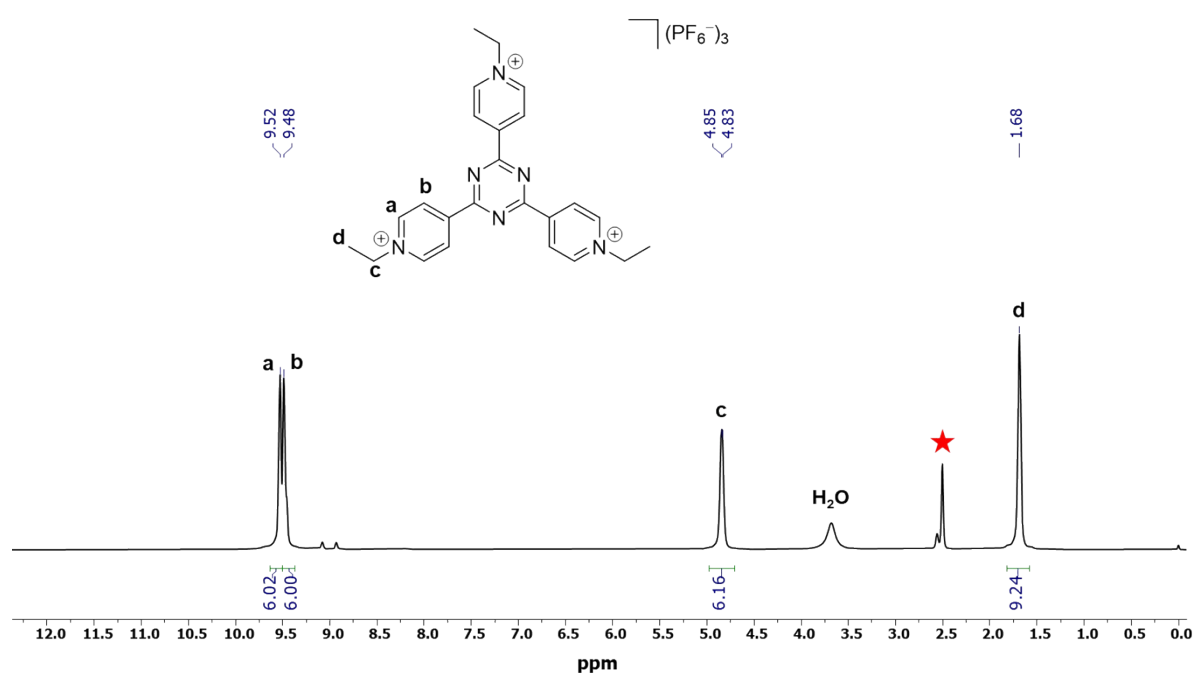

**Figure S1.** <sup>1</sup>H NMR Spectrum of [1(PF<sub>6</sub>)<sub>3</sub>] (500 MHz, DMSO-*d*<sub>6</sub>, 298 K). The solvent signal is denoted as red star.

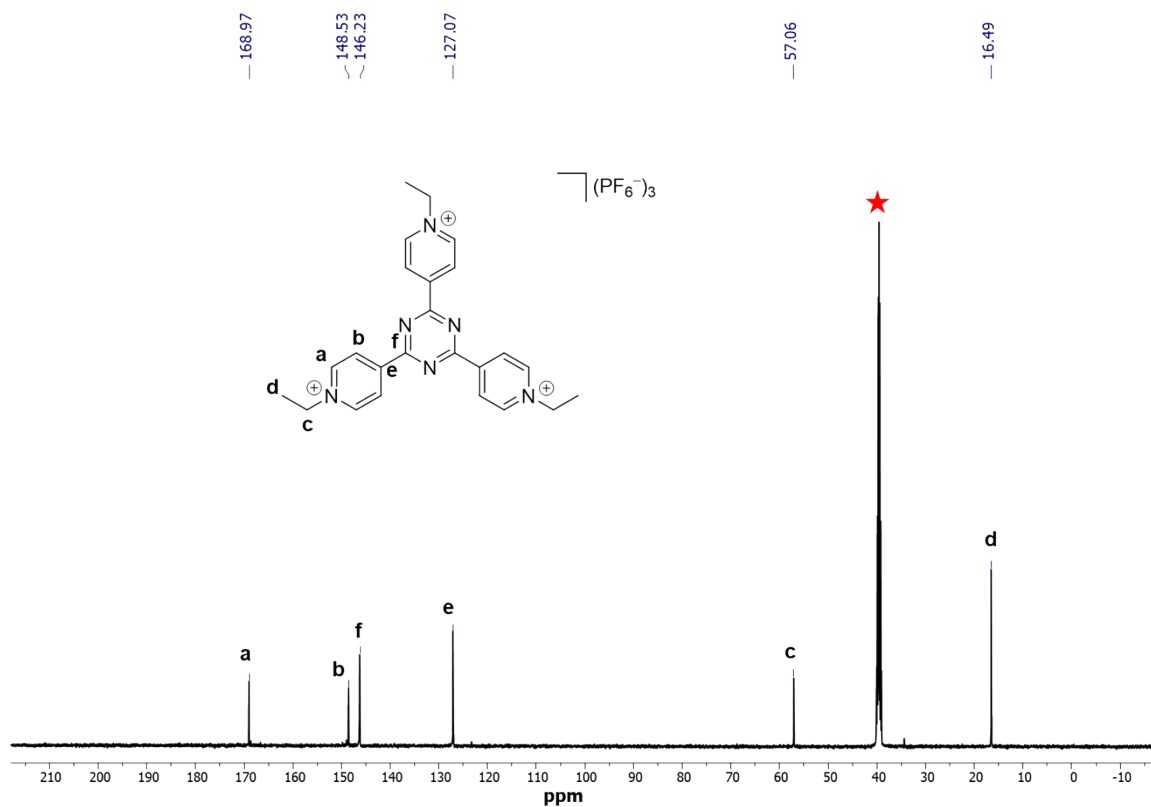

**Figure S2.**  $^{13}\text{C}$   $\{^1\text{H}\}$  NMR Spectrum of  $[\mathbf{1}(\text{PF}_6)_3]$  (125 MHz,  $\text{DMSO-}d_6$ , 298 K). The solvent signal is denoted as red star.

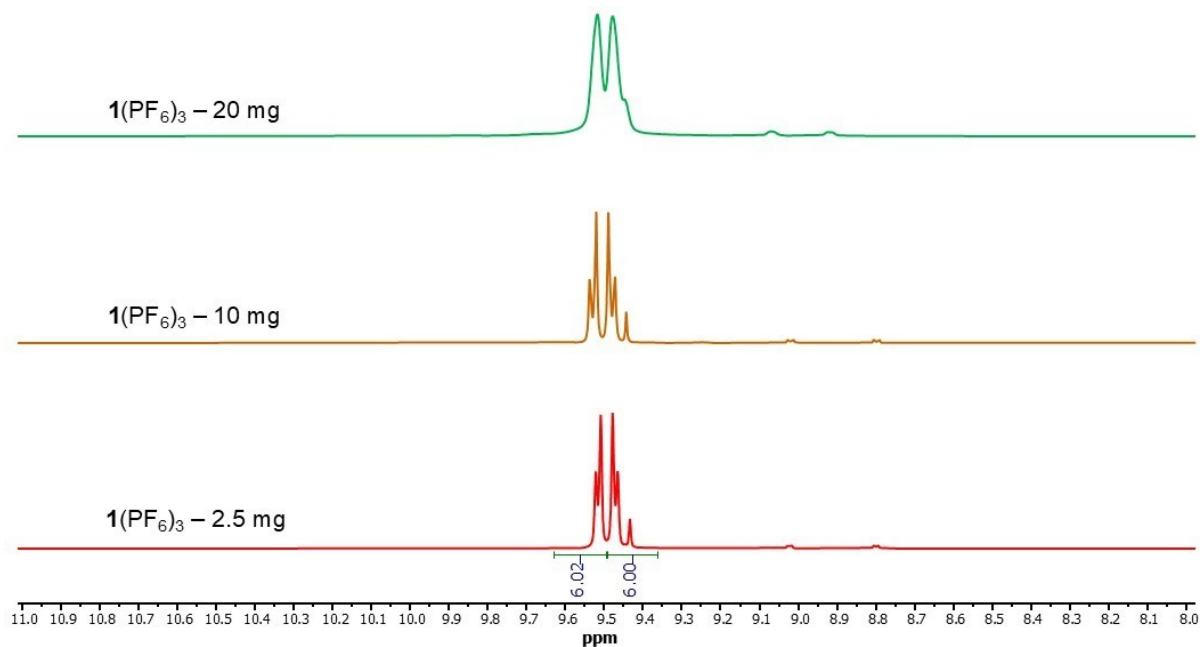

**Figure S3.** Concentration-dependent behavioural change of  $\mathbf{1}(\text{PF}_6)_3$  monitored by  $^1\text{H}$  NMR spectroscopy (400 MHz, 298K,  $\text{DMSO-}d_6$ ).

### 3.2 NMR Spectra from 'host-guest' studies

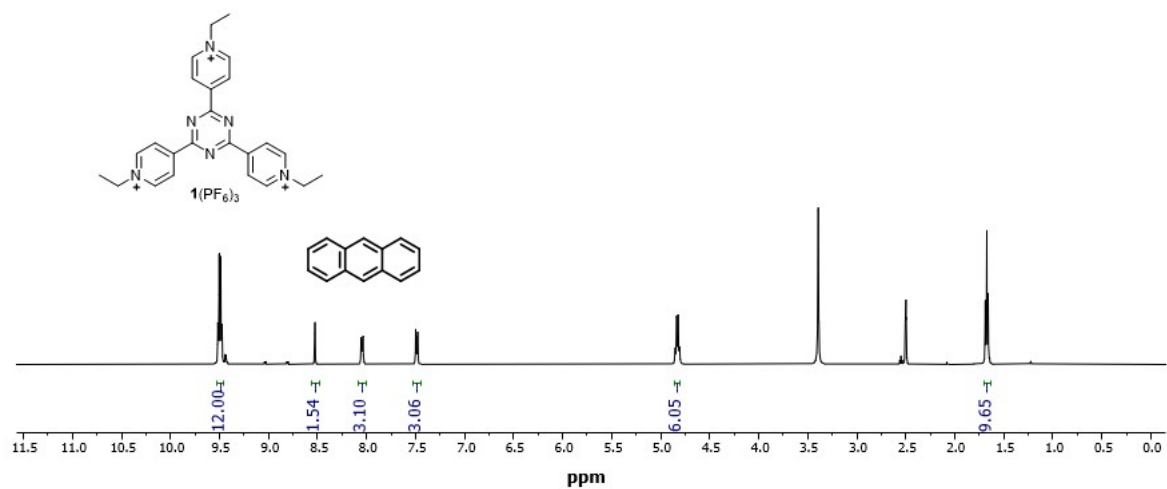

**Figure S4.**  $^1\text{H}$  NMR Spectrum obtained from the co-crystals of  $\mathbf{1}(\text{PF}_6)_3 \cdot \text{anthracene}$  (400 MHz,  $\text{DMSO-}d_6$ , 298 K).

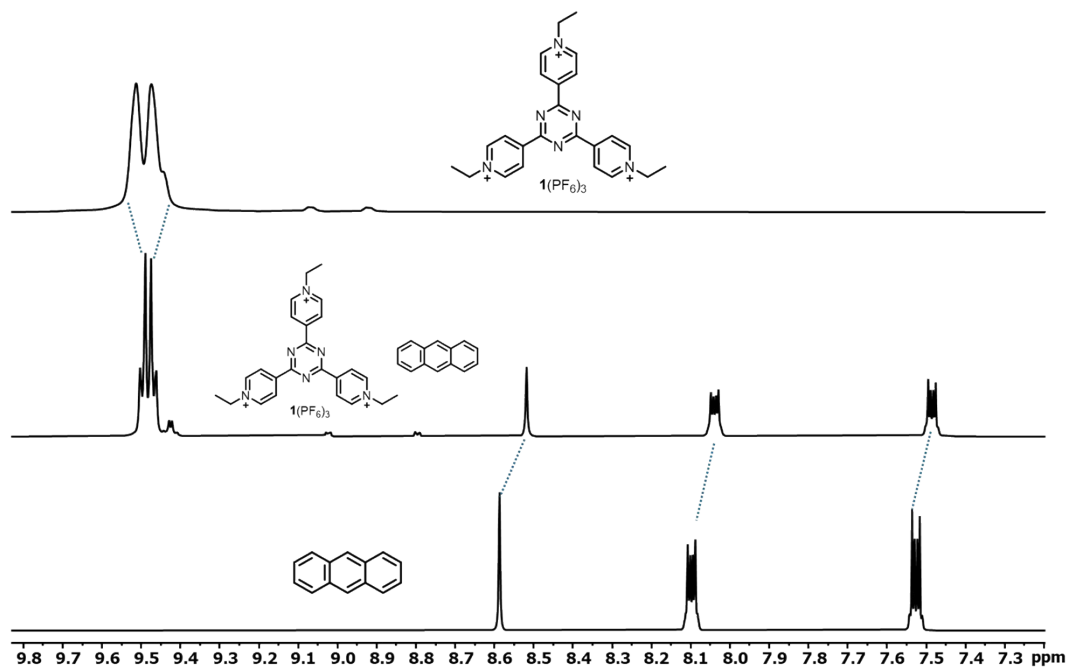

**Figure S5.** Monitoring the donor-acceptor interactions by  $^1\text{H}$  NMR spectroscopy (400 MHz, 298 K). The significant upfield shift was observed for anthracene protons compared to pyridinium protons of  $\mathbf{1}(\text{PF}_6)_3$  after complexation.

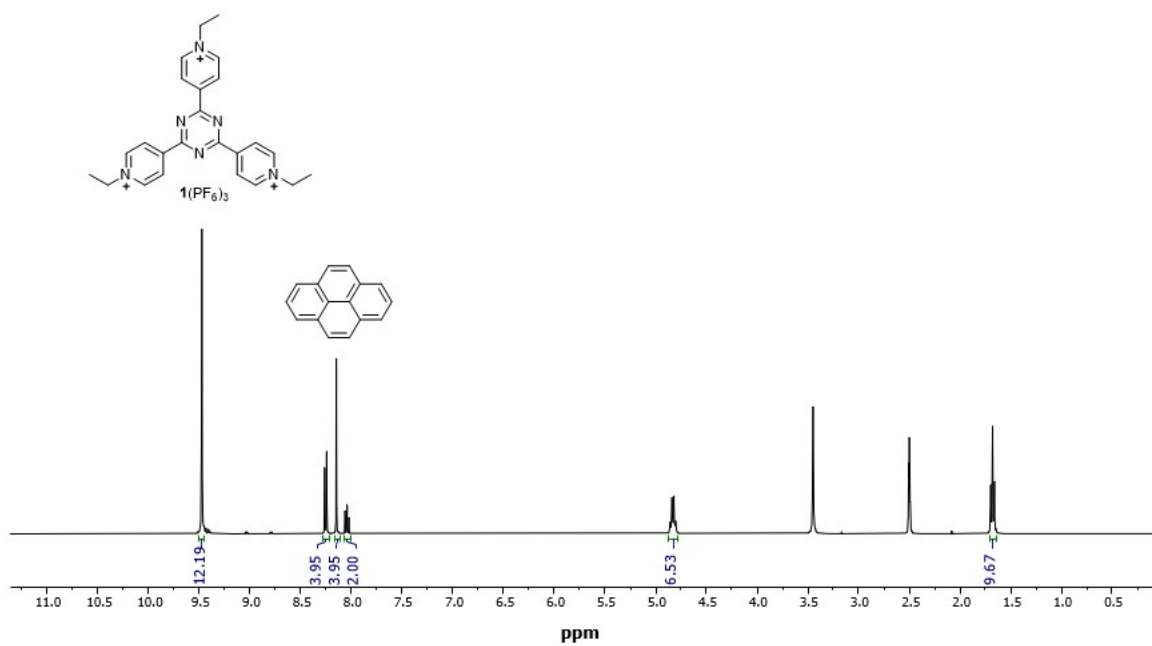

**Figure S6.**  $^1\text{H}$  NMR Spectrum obtained from the co-crystals of  $\mathbf{1}(\text{PF}_6)_3 \cdot \text{pyrene}$  (400 MHz,  $\text{DMSO-}d_6$ , 298 K).

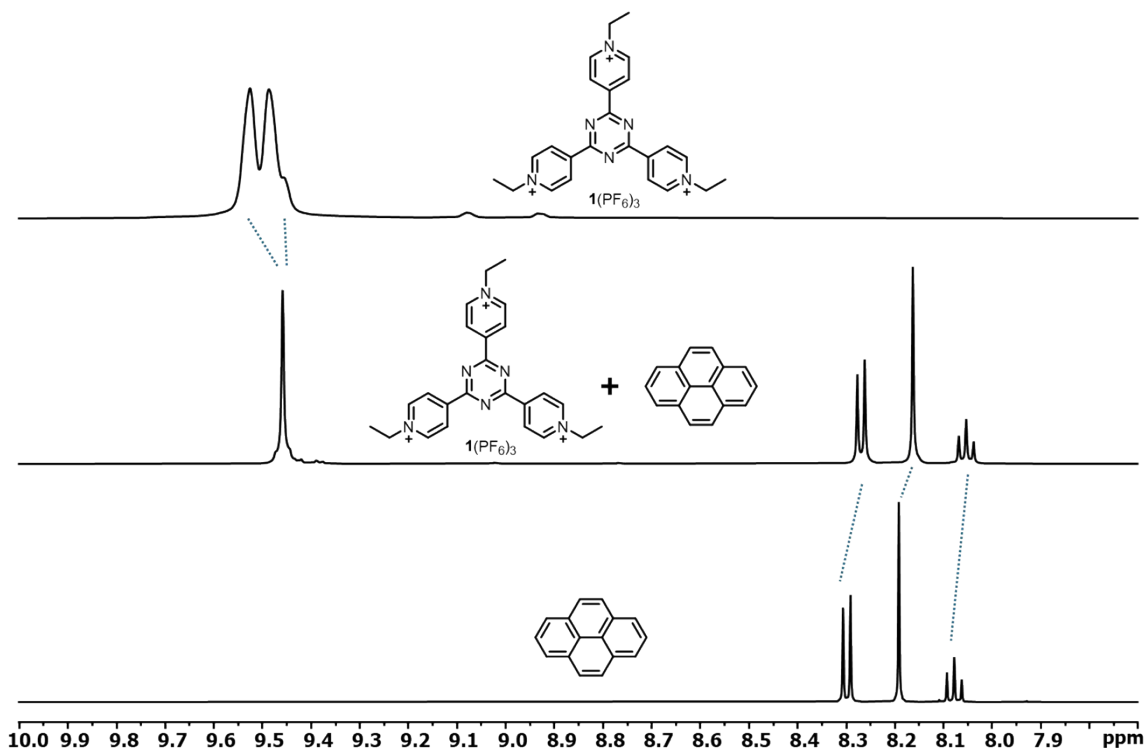

**Figure S7.** Monitoring the donor-acceptor interactions by  $^1\text{H}$  NMR spectroscopy (400 MHz, 298 K). The significant upfield shift was observed for pyrene protons compared to pyridinium protons of  $\mathbf{1}(\text{PF}_6)_3$  after complexation.

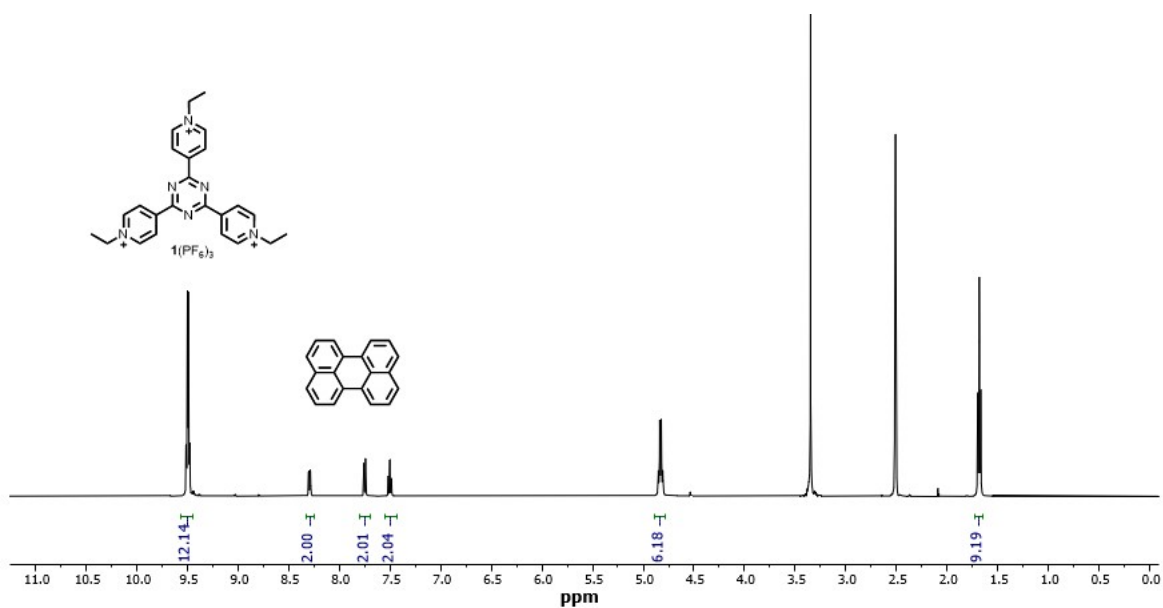

**Figure S8.**  $^1\text{H}$  NMR Spectrum obtained from the co-crystals of  $\mathbf{1}(\text{PF}_6)_3 \cdot \text{perylene}$  (400 MHz,  $\text{DMSO-}d_6$ , 298 K).

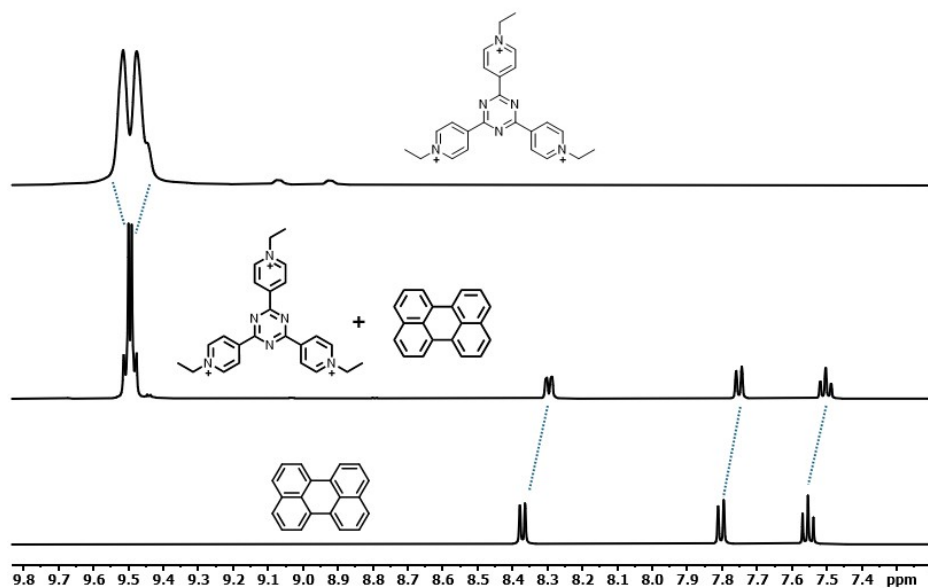

**Figure S9.** Monitoring the donor-acceptor interactions by <sup>1</sup>H NMR spectroscopy (400 MHz, 298 K). The significant upfield shift was observed for pyrene protons compared to pyridinium protons of **1**(PF<sub>6</sub>)<sub>3</sub> after complexation.

### 3.3 <sup>1</sup>H NMR Titration with **1**(PF<sub>6</sub>)<sub>3</sub> and pyrene

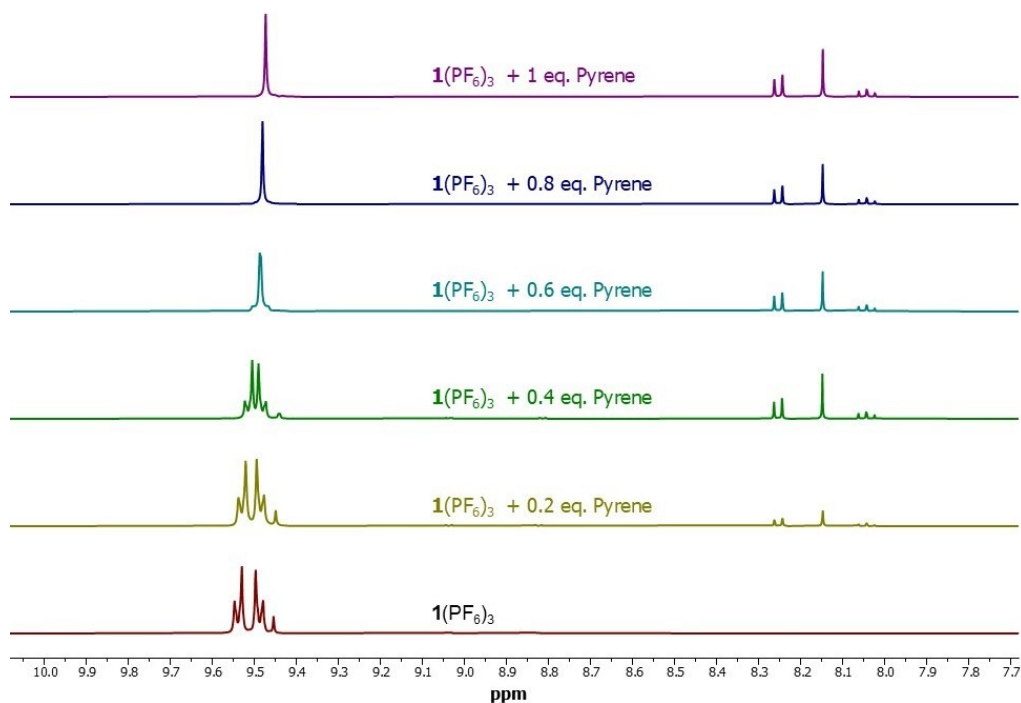

**Figure S10.** <sup>1</sup>H NMR titration of **1**(PF<sub>6</sub>)<sub>3</sub> (10 mg in 0.5 mL DMSO-*d*<sub>6</sub>, 1 equiv) with pyrene (0.2 – 1 equiv, 0.5 mg – 2.5 mg) at 298 K, 400 MHz.

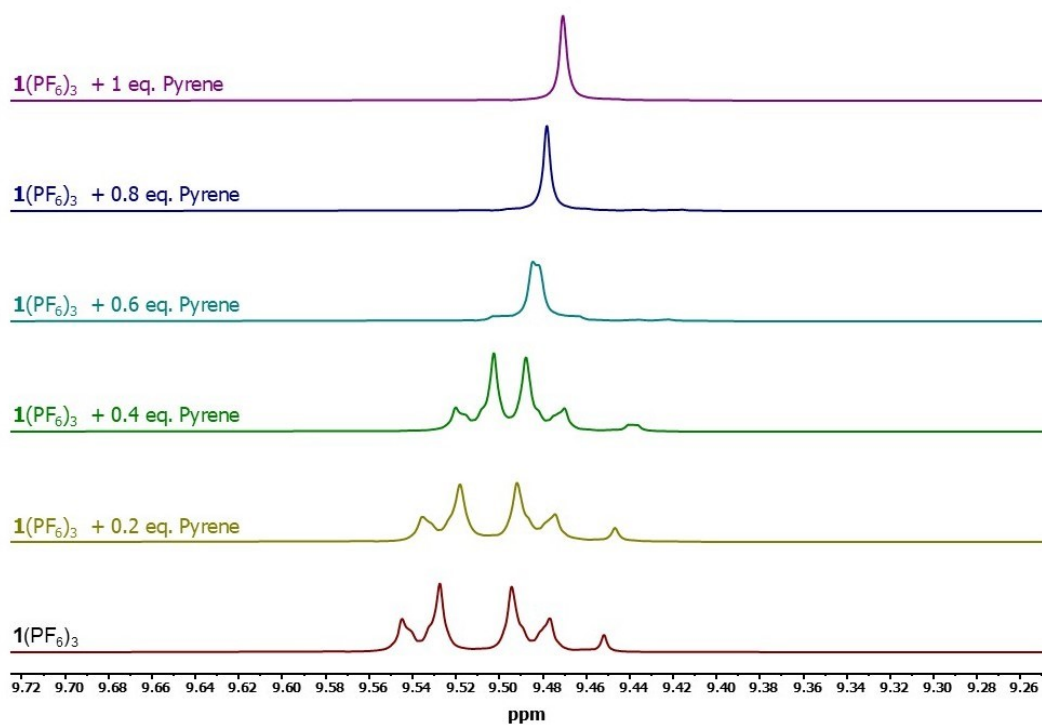

**Figure S11.** Selected portion of  $^1\text{H}$  NMR spectra (from Figure S10) obtained from titration of  $1(\text{PF}_6)_3$  (10 mg in 0.5 mL  $\text{DMSO-}d_6$ , 1 equiv) with pyrene (0.2 – 1 equiv, 0.5 mg – 2.5 mg) at 298 K, 400 MHz. The spectra show the significant change of host signals in the presence of pyrene guest.

#### 4. HR-ESI-MS Spectrum

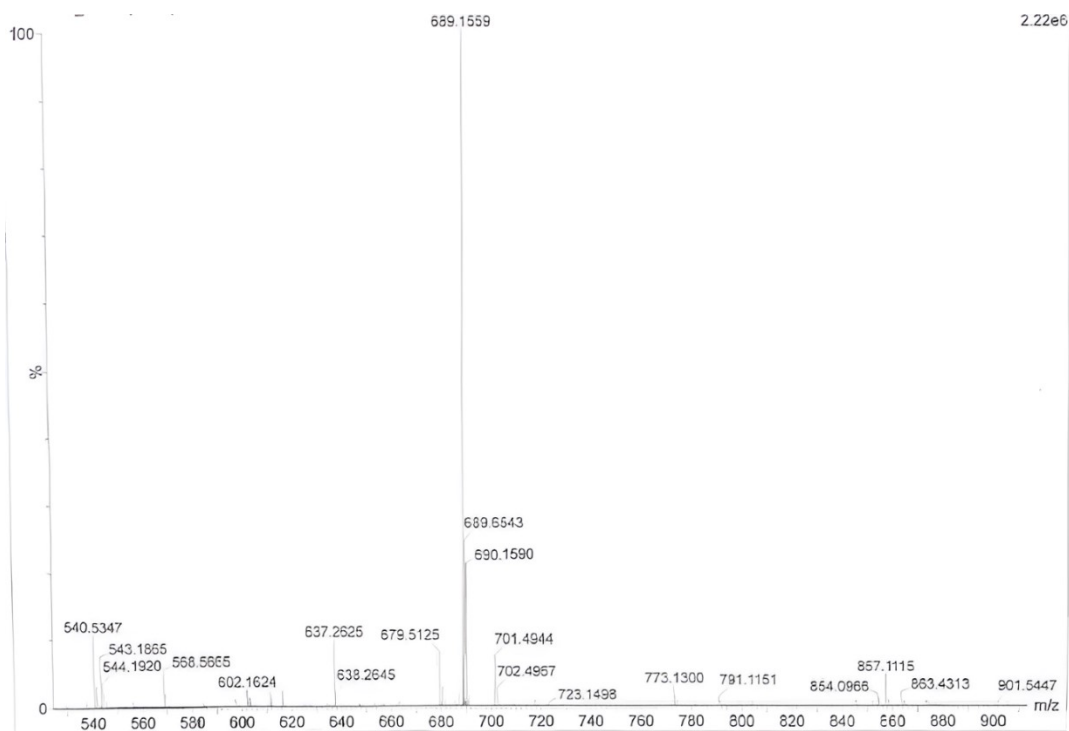

**Figure S12.** HR-ESI-MS spectrum of  $1(\text{PF}_6)_3$  in acetonitrile (+ve mode).

## 5. X-ray crystallographic studies

Single crystals, suitable for X-ray diffraction analysis, were grown by slow evaporation of a concentrated solution of the compounds. Data were collected on a Bruker D8 quest diffractometer with MoK $\alpha$  ( $\lambda = 0.71073$ ) radiation. Preliminary lattice parameters and orientation matrices were obtained from three sets of frames. Then full data were collected using the  $\omega$  and  $\phi$  scan method with a frame width of  $0.5^\circ$ . Data were processed with the SAINT+ program for reduction and cell refinement. Multi-scan absorption corrections were applied by using the SADABS program for area detector.<sup>[2]</sup> The structures were solved by SHELXT<sup>[3]</sup> and refined with SHELXL<sup>[4]</sup> using Olex2 program.<sup>[5]</sup> Most of the PF<sub>6</sub><sup>-</sup> anions are found in two-fold disorder and accordingly, similar bond distance (SADI), similar  $U_{ij}$  (SIMU), and rigid body restraints (RIGU) were applied. Phenanthrene and pyrene molecules were also found in two-fold disorder and treated with the above mentioned restraints. The CIFs are submitted to CCDC (2476293-2476297) and can be obtained free of charge via the joint Cambridge Crystallographic Data Centre (CCDC) and Fachinformationszentrum Karlsruhe through <https://summary.ccdc.cam.ac.uk/structure-summary-form>.

### Crystallization and details

**1(PF<sub>6</sub>)<sub>3</sub>**: Slow evaporation of solvent at ambient temperature from a saturated solution of **1(PF<sub>6</sub>)<sub>3</sub>** in acetonitrile or dimethylformamide yielded needle and block-shaped colourless crystals of **1(PF<sub>6</sub>)<sub>3</sub>**.

**Crystallization of all donor-acceptor complexes {1(PF<sub>6</sub>)<sub>3</sub>•anthracene, 1(PF<sub>6</sub>)<sub>3</sub>•phenanthrene and 1(PF<sub>6</sub>)<sub>3</sub>•pyrene}**: 1.5 equiv. of donors were added to an acetonitrile solution of **1(PF<sub>6</sub>)<sub>3</sub>**. The solution was sonicated to completely dissolve the donors. In case of undissolved donors, slightly excess amount of acetonitrile or dimethylformamide was added into the solution to prepare a saturated solution. Subsequently, the solutions were allowed to slowly evaporate at an ambient temperature, which resulted in the good quality single-crystals.

**[DMFC]PF<sub>6</sub>**: The addition of equivalent amount of decamethylferrocene into the acetonitrile solution of **1(PF<sub>6</sub>)<sub>3</sub>** immediately formed light green solution. The vial containing the oxidized ferrocenium hexafluorophosphate was then kept under a nitrogen atmosphere. The slow evaporation of acetonitrile from that solution yielded single crystals in 3-4 days.

**Table 1.** Crystal data and structure refinement for **1**(PF<sub>6</sub>)<sub>3</sub>

|                                                              |                                                                                  |
|--------------------------------------------------------------|----------------------------------------------------------------------------------|
| CCDC No.                                                     | 2476293                                                                          |
| Identification code                                          | TETPT_0m                                                                         |
| Empirical formula                                            | C <sub>12</sub> H <sub>13.5</sub> F <sub>9</sub> N <sub>3</sub> P <sub>1.5</sub> |
| Formula weight                                               | 417.21                                                                           |
| Temperature/K                                                | 273.15                                                                           |
| Crystal system                                               | trigonal                                                                         |
| Space group                                                  | <i>R</i> 3m                                                                      |
| <i>a</i> /Å                                                  | 18.329(7)                                                                        |
| <i>b</i> /Å                                                  | 18.329(7)                                                                        |
| <i>c</i> /Å                                                  | 8.653(3)                                                                         |
| $\alpha$ /°                                                  | 90                                                                               |
| $\beta$ /°                                                   | 90                                                                               |
| $\gamma$ /°                                                  | 120                                                                              |
| Volume/Å <sup>3</sup>                                        | 2518(2)                                                                          |
| <i>Z</i>                                                     | 6                                                                                |
| $\rho_{\text{calc}}$ /cm <sup>3</sup>                        | 1.651                                                                            |
| $\mu$ /mm <sup>-1</sup>                                      | 0.306                                                                            |
| <i>F</i> (000)                                               | 1260.0                                                                           |
| Crystal size/mm <sup>3</sup>                                 | 0.1 × 0.05 × 0.02                                                                |
| Radiation                                                    | MoK $\alpha$ ( $\lambda$ = 0.71073)                                              |
| 2 $\Theta$ range for data collection/°                       | 4.444 to 50.006                                                                  |
| Index ranges                                                 | -21 ≤ <i>h</i> ≤ 21, -21 ≤ <i>k</i> ≤ 21, -10 ≤ <i>l</i> ≤ 10                    |
| Reflections collected                                        | 8853                                                                             |
| Independent reflections                                      | 1090 [ <i>R</i> <sub>int</sub> = 0.0506, <i>R</i> <sub>sigma</sub> = 0.0356]     |
| Data/restraints/parameters                                   | 1090/551/113                                                                     |
| Goodness-of-fit on <i>F</i> <sup>2</sup>                     | 1.085                                                                            |
| Final <i>R</i> indexes [ <i>I</i> ≥ 2 $\sigma$ ( <i>I</i> )] | <i>R</i> <sub>1</sub> = 0.0479, <i>wR</i> <sub>2</sub> = 0.1292                  |
| Final <i>R</i> indexes [all data]                            | <i>R</i> <sub>1</sub> = 0.0489, <i>wR</i> <sub>2</sub> = 0.1307                  |
| Largest diff. peak/hole / e Å <sup>-3</sup>                  | 0.34/-0.26                                                                       |
| Flack parameter                                              | 0.12(6)                                                                          |

**Table 2.** Crystal data and structure refinement for **1**(PF<sub>6</sub>)<sub>3</sub>•anthracene.

|                                                              |                                                                               |
|--------------------------------------------------------------|-------------------------------------------------------------------------------|
| CCDC No                                                      | 2476294                                                                       |
| Identification code                                          | TETANT_a                                                                      |
| Empirical formula                                            | C <sub>38</sub> H <sub>37</sub> F <sub>18</sub> N <sub>6</sub> P <sub>3</sub> |
| Formula weight                                               | 1012.64                                                                       |
| Temperature/K                                                | 273.15                                                                        |
| Crystal system                                               | monoclinic                                                                    |
| Space group                                                  | <i>P</i> 2 <sub>1</sub> / <i>c</i>                                            |
| <i>a</i> /Å                                                  | 14.650(6)                                                                     |
| <i>b</i> /Å                                                  | 24.299(9)                                                                     |
| <i>c</i> /Å                                                  | 13.101(4)                                                                     |
| $\alpha$ /°                                                  | 90                                                                            |
| $\beta$ /°                                                   | 110.995(11)                                                                   |
| $\gamma$ /°                                                  | 90                                                                            |
| Volume/Å <sup>3</sup>                                        | 4354(3)                                                                       |
| <i>Z</i>                                                     | 4                                                                             |
| $\rho_{\text{calc}}$ /cm <sup>3</sup>                        | 1.545                                                                         |
| $\mu$ /mm <sup>-1</sup>                                      | 0.251                                                                         |
| <i>F</i> (000)                                               | 2056.0                                                                        |
| Crystal size/mm <sup>3</sup>                                 | 0.31 × 0.11 × 0.09                                                            |
| Radiation                                                    | MoK $\alpha$ ( $\lambda$ = 0.71073)                                           |
| 2 $\Theta$ range for data collection/°                       | 3.958 to 53.69                                                                |
| Index ranges                                                 | -16 ≤ <i>h</i> ≤ 18, -29 ≤ <i>k</i> ≤ 30, -16 ≤ <i>l</i> ≤ 16                 |
| Reflections collected                                        | 48675                                                                         |
| Independent reflections                                      | 9069 [ <i>R</i> <sub>int</sub> = 0.0749, <i>R</i> <sub>sigma</sub> = 0.0518]  |
| Data/restraints/parameters                                   | 9069/327/644                                                                  |
| Goodness-of-fit on <i>F</i> <sup>2</sup>                     | 1.038                                                                         |
| Final <i>R</i> indexes [ <i>I</i> ≥ 2 $\sigma$ ( <i>I</i> )] | <i>R</i> <sub>1</sub> = 0.0854, <i>wR</i> <sub>2</sub> = 0.2053               |
| Final <i>R</i> indexes [all data]                            | <i>R</i> <sub>1</sub> = 0.1334, <i>wR</i> <sub>2</sub> = 0.2363               |
| Largest diff. peak/hole / e Å <sup>-3</sup>                  | 0.45/-0.41                                                                    |

**Table 3.** Crystal data and structure refinement for **1**(PF<sub>6</sub>)<sub>3</sub>•phenanthrene.

|                                                              |                                                                               |
|--------------------------------------------------------------|-------------------------------------------------------------------------------|
| CCDC No                                                      | 2476295                                                                       |
| Identification code                                          | TETPTPHEN                                                                     |
| Empirical formula                                            | C <sub>38</sub> H <sub>37</sub> F <sub>18</sub> N <sub>6</sub> P <sub>3</sub> |
| Formula weight                                               | 1012.64                                                                       |
| Temperature/K                                                | 273.15                                                                        |
| Crystal system                                               | monoclinic                                                                    |
| Space group                                                  | <i>P</i> 2 <sub>1</sub> / <i>c</i>                                            |
| <i>a</i> /Å                                                  | 6.5813(4)                                                                     |
| <i>b</i> /Å                                                  | 26.6373(16)                                                                   |
| <i>c</i> /Å                                                  | 24.8163(16)                                                                   |
| $\alpha$ /°                                                  | 90                                                                            |
| $\beta$ /°                                                   | 91.357(2)                                                                     |
| $\gamma$ /°                                                  | 90                                                                            |
| Volume/Å <sup>3</sup>                                        | 4349.3(5)                                                                     |
| <i>Z</i>                                                     | 4                                                                             |
| $\rho_{\text{calc}}$ /g/cm <sup>3</sup>                      | 1.546                                                                         |
| $\mu$ /mm <sup>-1</sup>                                      | 0.252                                                                         |
| <i>F</i> (000)                                               | 2056.0                                                                        |
| Crystal size/mm <sup>3</sup>                                 | 0.31 × 0.17 × 0.099                                                           |
| Radiation                                                    | MoK $\alpha$ ( $\lambda$ = 0.71073)                                           |
| 2 $\Theta$ range for data collection/°                       | 4.488 to 50.216                                                               |
| Index ranges                                                 | -7 ≤ <i>h</i> ≤ 7, -31 ≤ <i>k</i> ≤ 31, -28 ≤ <i>l</i> ≤ 29                   |
| Reflections collected                                        | 65769                                                                         |
| Independent reflections                                      | 7743 [ <i>R</i> <sub>int</sub> = 0.1026, <i>R</i> <sub>sigma</sub> = 0.0539]  |
| Data/restraints/parameters                                   | 7743/2146/826                                                                 |
| Goodness-of-fit on <i>F</i> <sup>2</sup>                     | 1.079                                                                         |
| Final <i>R</i> indexes [ <i>I</i> ≥ 2 $\sigma$ ( <i>I</i> )] | <i>R</i> <sub>1</sub> = 0.1289, <i>wR</i> <sub>2</sub> = 0.2935               |
| Final <i>R</i> indexes [all data]                            | <i>R</i> <sub>1</sub> = 0.1771, <i>wR</i> <sub>2</sub> = 0.3254               |
| Largest diff. peak/hole / e Å <sup>-3</sup>                  | 0.71/-0.56                                                                    |

**Table 4.** Crystal data and structure refinement for **1(PF<sub>6</sub>)<sub>3</sub>•pyrene**.

|                                                              |                                                                               |
|--------------------------------------------------------------|-------------------------------------------------------------------------------|
| CCDC No                                                      | 2476296                                                                       |
| Identification code                                          | TETPTPYR                                                                      |
| Empirical formula                                            | C <sub>40</sub> H <sub>37</sub> F <sub>18</sub> N <sub>6</sub> P <sub>3</sub> |
| Formula weight                                               | 1036.66                                                                       |
| Temperature/K                                                | 273.15                                                                        |
| Crystal system                                               | triclinic                                                                     |
| Space group                                                  | <i>P</i> -1                                                                   |
| <i>a</i> /Å                                                  | 6.530(2)                                                                      |
| <i>b</i> /Å                                                  | 13.125(5)                                                                     |
| <i>c</i> /Å                                                  | 26.157(10)                                                                    |
| $\alpha$ /°                                                  | 89.813(13)                                                                    |
| $\beta$ /°                                                   | 89.925(11)                                                                    |
| $\gamma$ /°                                                  | 85.934(12)                                                                    |
| Volume/Å <sup>3</sup>                                        | 2236.2(15)                                                                    |
| <i>Z</i>                                                     | 2                                                                             |
| $\rho_{\text{calc}}$ /cm <sup>3</sup>                        | 1.540                                                                         |
| $\mu$ /mm <sup>-1</sup>                                      | 0.247                                                                         |
| <i>F</i> (000)                                               | 1052.0                                                                        |
| Crystal size/mm <sup>3</sup>                                 | 0.37 × 0.12 × 0.09                                                            |
| Radiation                                                    | MoK $\alpha$ ( $\lambda$ = 0.71073)                                           |
| 2 $\Theta$ range for data collection/°                       | 4.396 to 51.696                                                               |
| Index ranges                                                 | -7 ≤ <i>h</i> ≤ 7, -15 ≤ <i>k</i> ≤ 15, -31 ≤ <i>l</i> ≤ 31                   |
| Reflections collected                                        | 62642                                                                         |
| Independent reflections                                      | 8381 [ <i>R</i> <sub>int</sub> = 0.1068, <i>R</i> <sub>sigma</sub> = 0.0606]  |
| Data/restraints/parameters                                   | 8381/2305/865                                                                 |
| Goodness-of-fit on <i>F</i> <sup>2</sup>                     | 1.104                                                                         |
| Final <i>R</i> indexes [ <i>I</i> ≥ 2 $\sigma$ ( <i>I</i> )] | <i>R</i> <sub>1</sub> = 0.1382, <i>wR</i> <sub>2</sub> = 0.3491               |
| Final <i>R</i> indexes [all data]                            | <i>R</i> <sub>1</sub> = 0.1898, <i>wR</i> <sub>2</sub> = 0.3834               |
| Largest diff. peak/hole / e Å <sup>-3</sup>                  | 0.61/-0.35                                                                    |

**Table 5.** Crystal data and structure refinement for [DMFC]PF<sub>6</sub>.

|                                                              |                                                                              |
|--------------------------------------------------------------|------------------------------------------------------------------------------|
| CCDC No                                                      | 2476297                                                                      |
| Identification code                                          | DMFCPF6                                                                      |
| Empirical formula                                            | C <sub>20</sub> H <sub>30</sub> F <sub>6</sub> FeP                           |
| Formula weight                                               | 471.26                                                                       |
| Temperature/K                                                | 273.15                                                                       |
| Crystal system                                               | monoclinic                                                                   |
| Space group                                                  | C2/m                                                                         |
| <i>a</i> /Å                                                  | 14.341(2)                                                                    |
| <i>b</i> /Å                                                  | 8.9089(12)                                                                   |
| <i>c</i> /Å                                                  | 9.1627(15)                                                                   |
| $\alpha$ /°                                                  | 90                                                                           |
| $\beta$ /°                                                   | 112.327(5)                                                                   |
| $\gamma$ /°                                                  | 90                                                                           |
| Volume/Å <sup>3</sup>                                        | 1082.9(3)                                                                    |
| <i>Z</i>                                                     | 2                                                                            |
| $\rho$ calcg/cm <sup>3</sup>                                 | 1.445                                                                        |
| $\mu$ /mm <sup>-1</sup>                                      | 0.823                                                                        |
| <i>F</i> (000)                                               | 490.0                                                                        |
| Crystal size/mm <sup>3</sup>                                 | 0.14 × 0.067 × 0.064                                                         |
| Radiation                                                    | MoK $\alpha$ ( $\lambda$ = 0.71073)                                          |
| 2 $\Theta$ range for data collection/°                       | 4.806 to 50.878                                                              |
| Index ranges                                                 | -17 ≤ <i>h</i> ≤ 17, -10 ≤ <i>k</i> ≤ 10, -11 ≤ <i>l</i> ≤ 11                |
| Reflections collected                                        | 15517                                                                        |
| Independent reflections                                      | 1061 [ <i>R</i> <sub>int</sub> = 0.0490, <i>R</i> <sub>sigma</sub> = 0.0181] |
| Data/restraints/parameters                                   | 1061/0/77                                                                    |
| Goodness-of-fit on <i>F</i> <sup>2</sup>                     | 1.176                                                                        |
| Final <i>R</i> indexes [ <i>I</i> ≥ 2 $\sigma$ ( <i>I</i> )] | <i>R</i> <sub>1</sub> = 0.0355, <i>wR</i> <sub>2</sub> = 0.0985              |
| Final <i>R</i> indexes [all data]                            | <i>R</i> <sub>1</sub> = 0.0370, <i>wR</i> <sub>2</sub> = 0.0993              |
| Largest diff. peak/hole / e Å <sup>-3</sup>                  | 0.51/-0.27                                                                   |

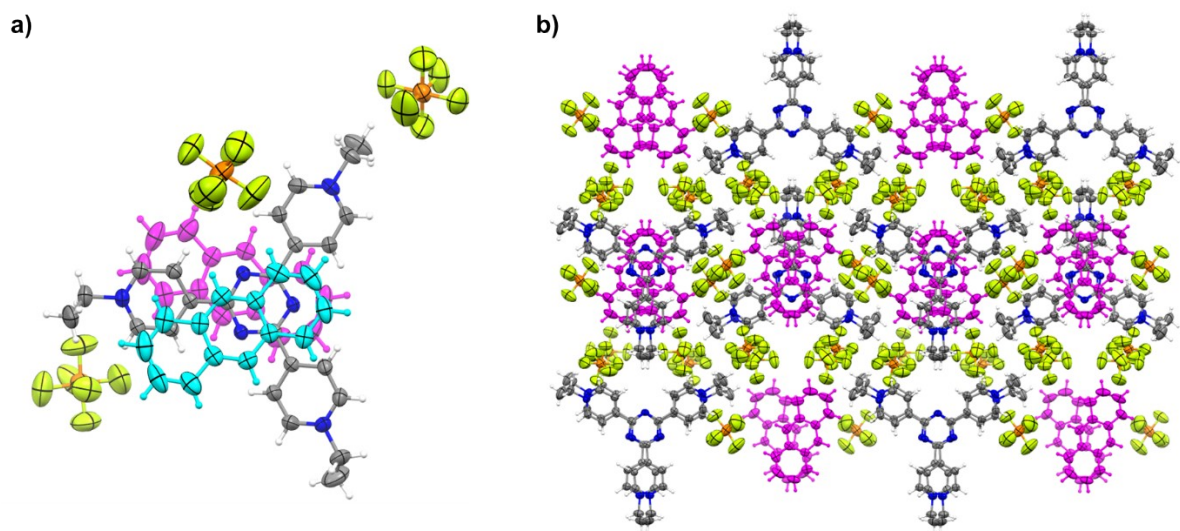

**Figure S13.** X-ray diffraction structure of 1(PF<sub>6</sub>)<sub>3</sub>•anthracene adduct. **a)** Asymmetric unit and **b)** packing structure.

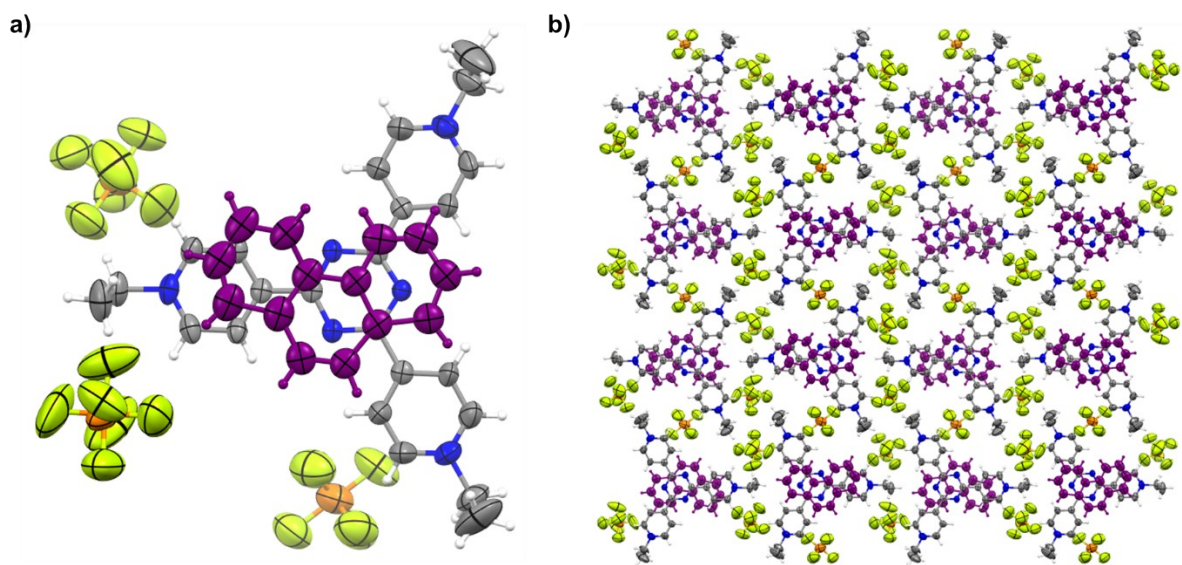

**Figure S14.** X-ray diffraction structure of 1(PF<sub>6</sub>)<sub>3</sub>•phenanthrene adduct. **a)** Asymmetric unit and **b)** packing structure.

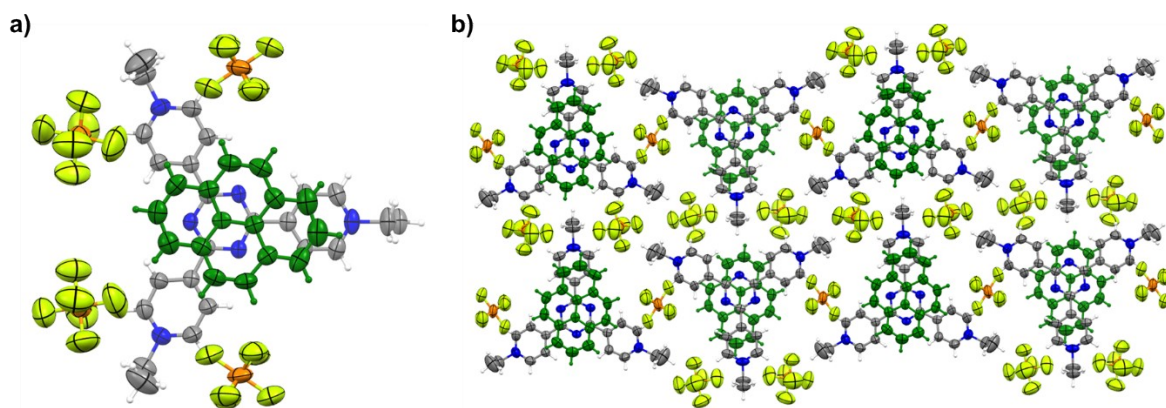

**Figure S15.** X-ray diffraction structure of  $1(\text{PF}_6)_3 \cdot \text{pyrene}$  adduct. **a)** Asymmetric unit and **b)** packing structure.

## 6. Electrochemical studies

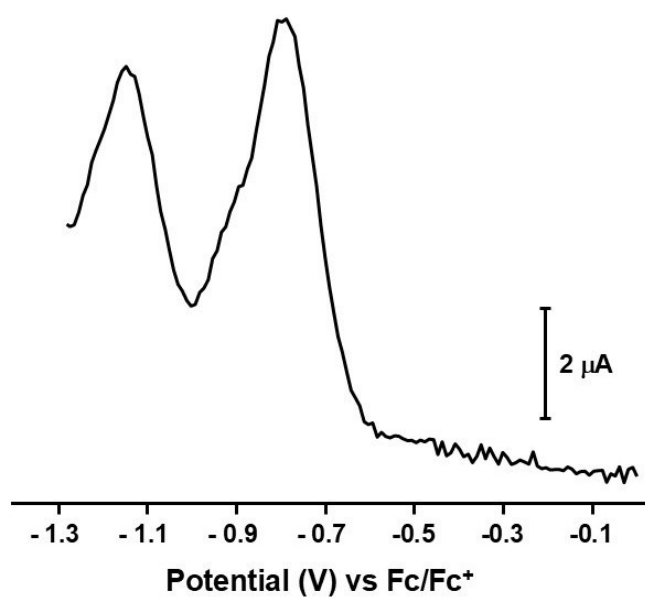

**Figure S16.** Square-wave voltammogram of  $1(\text{PF}_6)_3$  performed at a standard scan rate of 100 mV/s using  $n\text{Bu}_4\text{NPF}_6$  (0.1 M) as supporting electrolyte, referenced with  $\text{Fc}/\text{Fc}^+$  standard, and Pt wire as working electrode in dry dimethyl formamide (DMF).

## 7. Determination of binding constants

The binding constants have been calculated by monitoring the change of intensity in the photoluminescence spectroscopy. Upon gradual addition of tricationic acceptor  $1(\text{PF}_6)_3$ , the luminescence intensities of the electron-rich polyaromatic hydrocarbons reduce. For all measurements, same concentrations of the acceptor  $1(\text{PF}_6)_3$  ( $5 \times 10^{-3}$  M) and donors ( $1 \times 10^{-5}$  M) were used. Degassed acetonitrile was used in every experiment. All are conducted in the ambient temperature.  $K_{11}$  and  $K_{12}$  values are by calculated by the global fit V0.5 analysis.<sup>[6]</sup>

### 7.1 Titration of naphthalene with $1(\text{PF}_6)_3$

**Table S6. Data values from the titration study of naphthalene with  $1(\text{PF}_6)_3$**

| [Naphthalene] | $1(\text{PF}_6)_3$ | $1(\text{PF}_6)_3$ /<br>[Naphthalene]<br>(equiv.) | $I_{323 \text{ nm}}$ | $I_{337 \text{ nm}}$ |
|---------------|--------------------|---------------------------------------------------|----------------------|----------------------|
| 0.00001       | 0                  | 0                                                 | 327356.938           | 268936.84            |
| 9.9701E-06    | 1.4955E-05         | 1.5                                               | 267689.401           | 224553.5             |
| 9.9404E-06    | 2.9821E-05         | 3                                                 | 224418.085           | 190682               |
| 9.9108E-06    | 4.4599E-05         | 4.5                                               | 177599.139           | 152138.58            |
| 9.8814E-06    | 5.9289E-05         | 6                                                 | 155500.062           | 132282.88            |
| 9.8522E-06    | 7.3892E-05         | 7.5                                               | 127664.478           | 111259.19            |
| 9.8232E-06    | 8.8409E-05         | 9                                                 | 95393.2727           | 83227.61             |
| 9.7943E-06    | 0.00010284         | 10.5                                              | 87758.3711           | 76219.71             |
| 9.7656E-06    | 0.00011719         | 12                                                | 76278.8772           | 65707.87             |
| 9.7371E-06    | 0.00013145         | 13.5                                              | 48339.3949           | 44684.18             |
| 9.7087E-06    | 0.00014563         | 15                                                | 37046.7195           | 33004.36             |
| 9.6805E-06    | 0.00015973         | 16.5                                              | 29453.384            | 28332.42             |
| 9.6525E-06    | 0.00017375         | 18                                                | 27527.8056           | 24828.47             |
| 9.6246E-06    | 0.00018768         | 19.5                                              | 18747.7837           | 17820.58             |
| 9.5969E-06    | 0.00020154         | 21                                                | 12168.3586           | 11980.67             |
| 9.5694E-06    | 0.00021531         | 22.5                                              | 10327.6736           | 8476.72              |

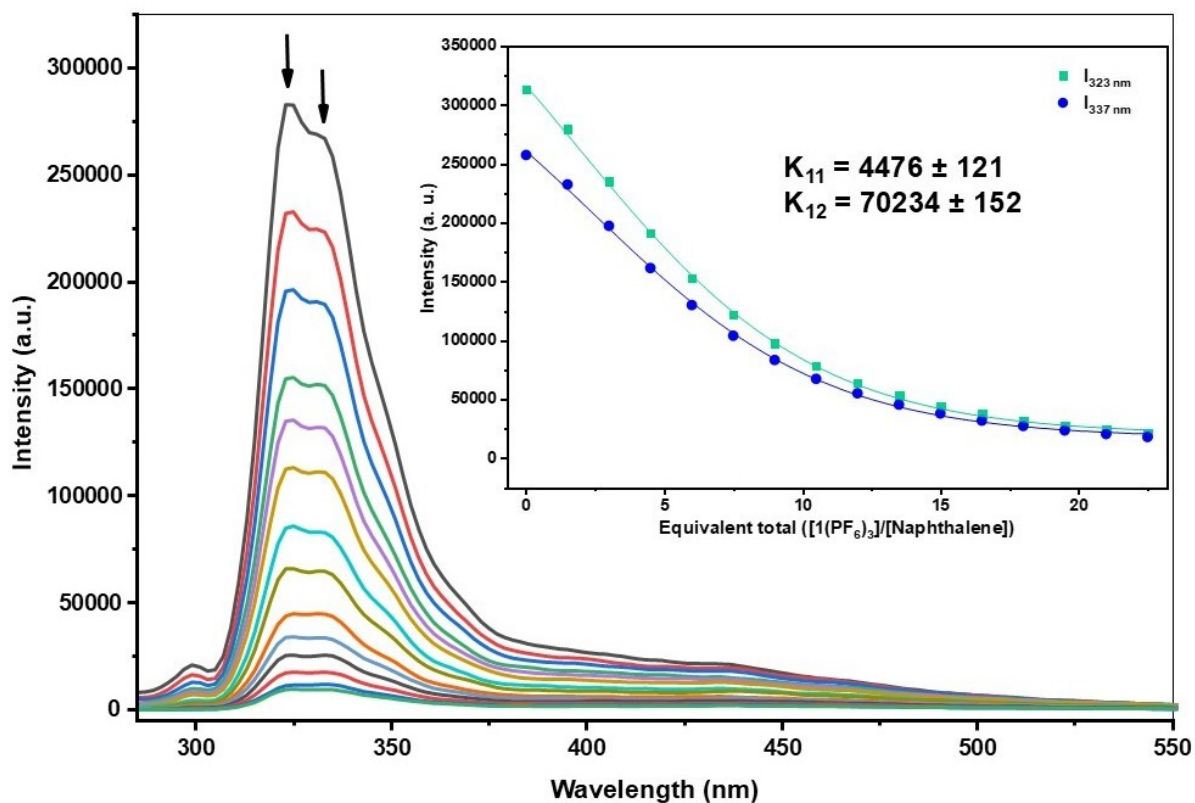

**Figure S17.** Photoluminescence titration between  $1(\text{PF}_6)_3$  and naphthalene (inset: fitting curve with scattered plot for binding constant measurement with their  $K_{11}$  and  $K_{12}$  values).  $K_{11}$  and  $K_{12}$  values are by calculated using the highest intense peak.

## 7.2 Titration of anthracene with $1(\text{PF}_6)_3$

**Table S7.** Data values from the titration study of anthracene with  $1(\text{PF}_6)_3$

| [Anthracene] | $1(\text{PF}_6)_3$ | $1(\text{PF}_6)_3/$<br>[anthracene]<br>(equiv.) | $I_{378 \text{ nm}}$ | $I_{399 \text{ nm}}$ |
|--------------|--------------------|-------------------------------------------------|----------------------|----------------------|
| 0.00001      | 0                  | 0                                               | 184658.343           | 195934.192           |
| 9.901E-06    | 4.9505E-05         | 5                                               | 176488.9             | 186404.856           |
| 9.8039E-06   | 9.8039E-05         | 10                                              | 169544.8             | 176461.171           |
| 9.7087E-06   | 0.00014563         | 15                                              | 163826.2             | 168198.972           |
| 9.6154E-06   | 0.00019231         | 20                                              | 156473.672           | 160685.299           |
| 9.5238E-06   | 0.0002381          | 25                                              | 149121.149           | 156234.853           |
| 9.434E-06    | 0.00028302         | 30                                              | 148304.202           | 149554.329           |
| 9.3458E-06   | 0.0003271          | 35                                              | 142585.573           | 145291.097           |
| 9.2593E-06   | 0.00037037         | 40                                              | 140951.679           | 139403.417           |
| 9.1743E-06   | 0.00041284         | 45                                              | 131965.3             | 134467.652           |
| 9.0909E-06   | 0.00045455         | 50                                              | 129514.4             | 128506.677           |

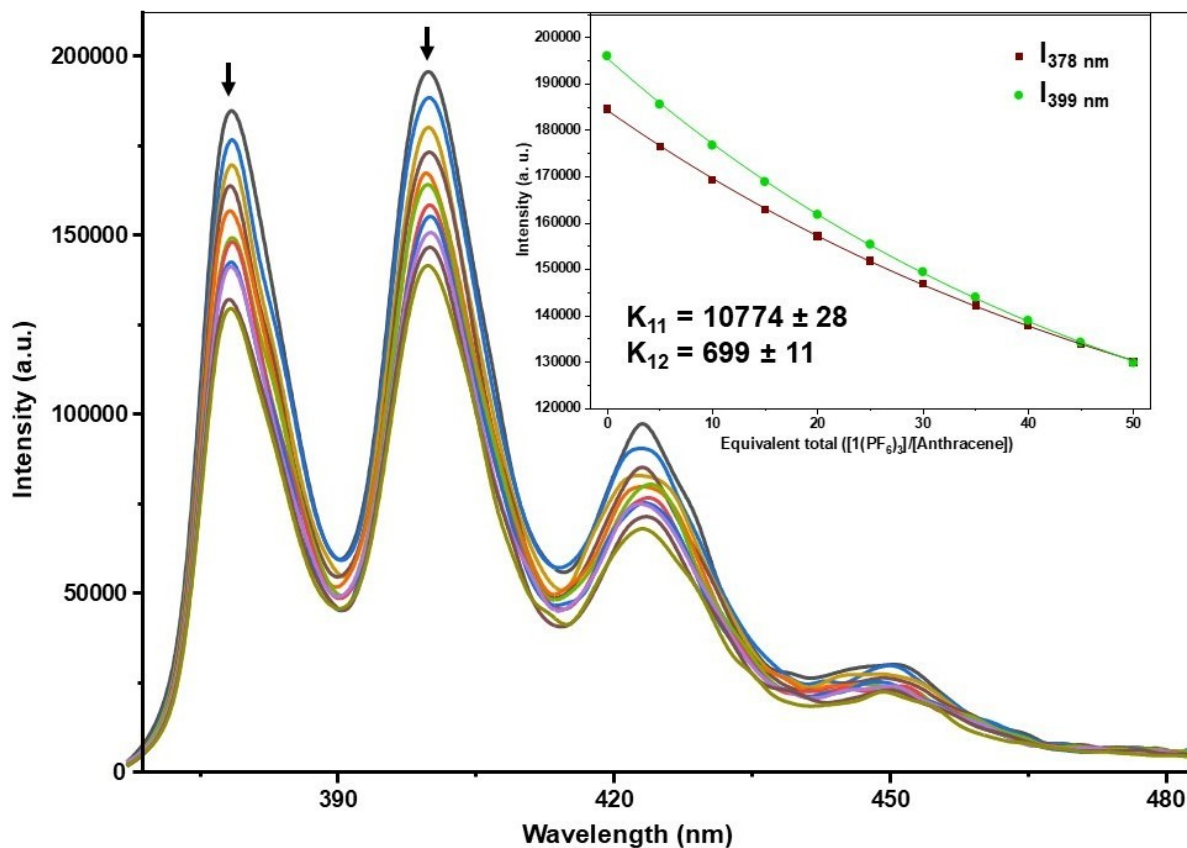

**Figure S18.** Photoluminescence titration between  $1(\text{PF}_6)_3$  and anthracene (inset: fitting curve with scattered plot for binding constant measurement with their  $K_{11}$  and  $K_{12}$  values).  $K_{11}$  and  $K_{12}$  values are by calculated using the highest intense peak.

### 7.3 Titration of pyrene with $[1(\text{PF}_6)_3]$

**Table S8.** Data values from the titration study of pyrene with  $[1(\text{PF}_6)_3]$

| [Pyrene]   | $[1(\text{PF}_6)_3]$ | $[1(\text{PF}_6)_3]/[\text{Pyrene}]$<br>(equiv.) | $I_{372 \text{ nm}}$ | $I_{383 \text{ nm}}$ | $I_{393 \text{ nm}}$ |
|------------|----------------------|--------------------------------------------------|----------------------|----------------------|----------------------|
| 0.00001    | 0                    | 0                                                | 600543.355           | 358390               | 483849.1             |
| 9.8039E-06 | 9.8039E-05           | 10                                               | 563194.984           | 341431.5             | 463875               |
| 9.6154E-06 | 0.00019231           | 20                                               | 528850.666           | 327299.4             | 442364.4             |
| 9.434E-06  | 0.00028302           | 30                                               | 488112.362           | 308927.7             | 417781               |
| 9.2593E-06 | 0.00037037           | 40                                               | 447373.368           | 289142.7             | 391661               |
| 9.0909E-06 | 0.00045455           | 50                                               | 414044.078           | 272184.2             | 367077.5             |
| 8.9286E-06 | 0.00053571           | 60                                               | 390549.476           | 259465.3             | 354785.8             |
| 8.7719E-06 | 0.00061404           | 70                                               | 358044.196           | 241093.6             | 333275.2             |
| 8.6207E-06 | 0.00068966           | 80                                               | 325168.167           | 224135.1             | 305618.8             |

|            |            |     |            |            |          |
|------------|------------|-----|------------|------------|----------|
| 8.4746E-06 | 0.00076271 | 90  | 290643.395 | 205852.7   | 281035.3 |
| 8.3333E-06 | 0.00083333 | 100 | 270855.111 | 198930.3   | 267207.1 |
| 8.1967E-06 | 0.00090164 | 110 | 253051.916 | 185085.473 | 256451.9 |

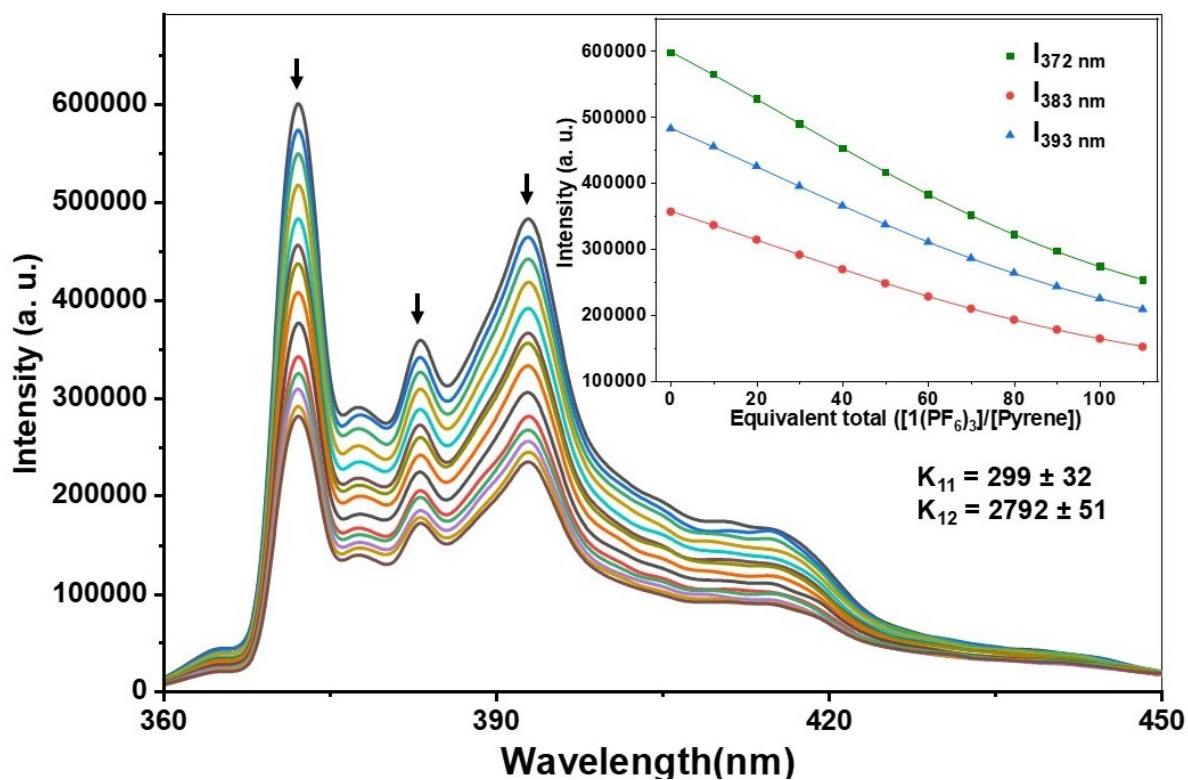

**Figure S19.** Photoluminescence titration between  $1(\text{PF}_6)_3$  and pyrene (inset: fitting curve for binding constant measurement with their  $K_{11}$  and  $K_{12}$  values).  $K_{11}$  and  $K_{12}$  values are by calculated using the highest intense peak.

#### 7.4 Titration of perylene with $[1(\text{PF}_6)_3]$

**Table S9.** Data values from the titration study of perylene with  $[1(\text{PF}_6)_3]$

| [Perylene] | $[1(\text{PF}_6)_3]$ | $[1(\text{PF}_6)_3] / [\text{Perylene}]$<br>(equiv.) | $I_{466 \text{ nm}}$ |
|------------|----------------------|------------------------------------------------------|----------------------|
| 0.00001    | 0                    | 0                                                    | 161074.337           |
| 9.901E-06  | 4.9505E-05           | 5                                                    | 156694.202           |
| 9.8039E-06 | 9.8039E-05           | 10                                                   | 151376.796           |
| 9.7087E-06 | 0.00014563           | 15                                                   | 147286.485           |
| 9.6154E-06 | 0.00019231           | 20                                                   | 143605.204           |
| 9.5238E-06 | 0.0002381            | 25                                                   | 139105.861           |
| 9.434E-06  | 0.00028302           | 30                                                   | 135833.612           |

|            |            |    |            |
|------------|------------|----|------------|
| 9.3458E-06 | 0.0003271  | 35 | 132970.394 |
| 9.2593E-06 | 0.00037037 | 40 | 127243.957 |
| 9.1743E-06 | 0.00041284 | 45 | 123562.677 |
| 9.0909E-06 | 0.00045455 | 50 | 122335.583 |

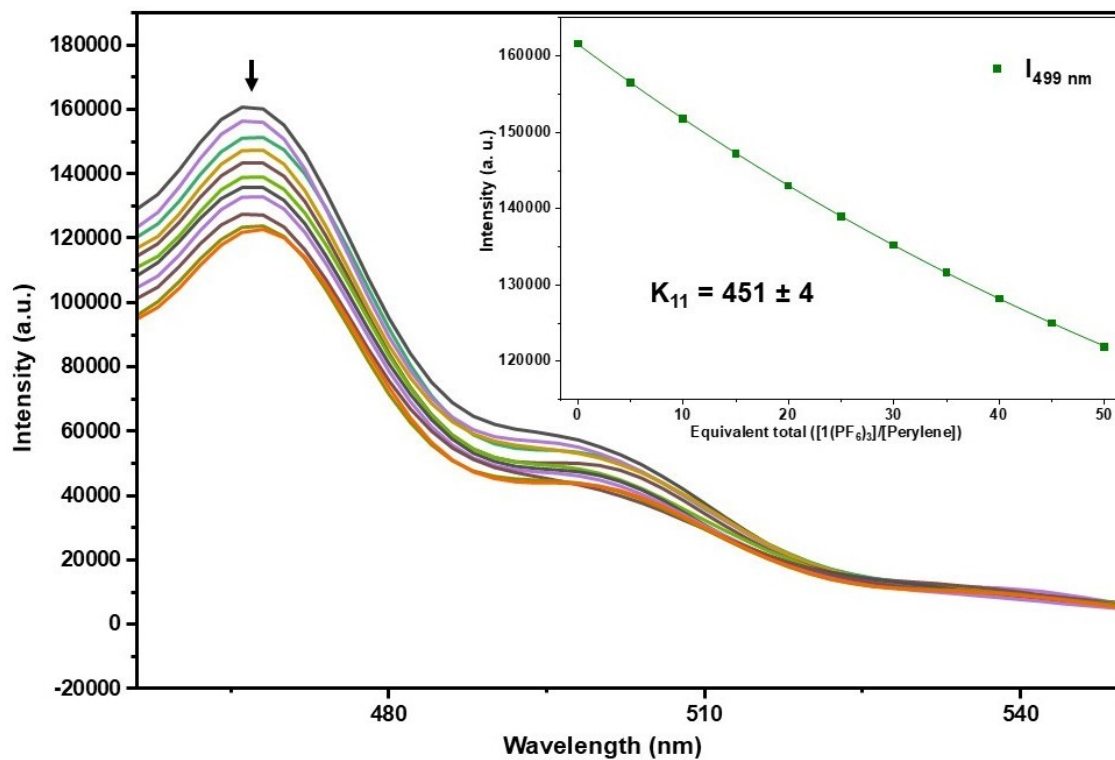

**Figure S20.** Photoluminescence titration between  $1(\text{PF}_6)_3$  and perylene (inset: fitting curve for binding constant measurement with their  $K_{11}$  value).

## 8. UV-vis Spectrum

### 8.1 Molar absorption co-efficient of $1(\text{PF}_6)_3$

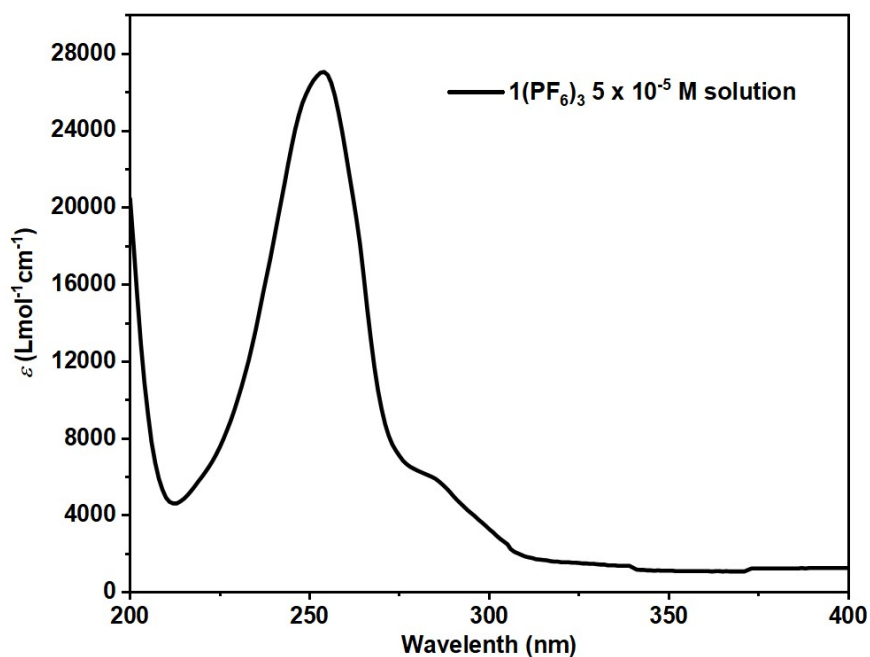

**Figure S21.** Absorption spectrum of  $1(\text{PF}_6)_3$  measured in acetonitrile ( $c = 5 \times 10^{-5} \text{ M}$ , 298 K). The molar extinction co-efficient ( $\epsilon$ ) is also calculated and included.

### 8.2 Oxidation of decamethylferrocene

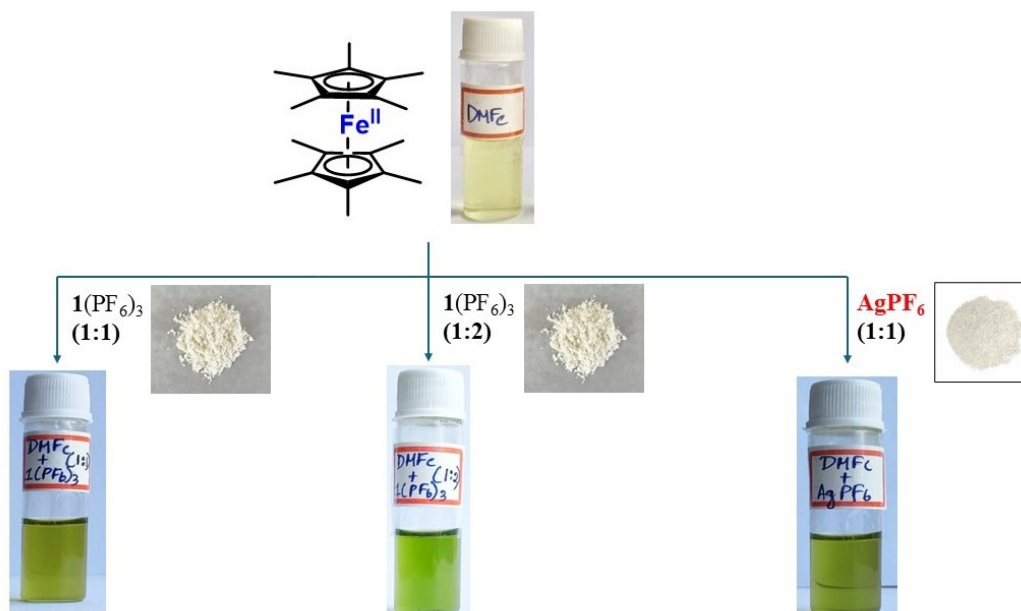

**Figure S22.** Oxidation of decamethylferrocene by  $1(\text{PF}_6)_3$  with different equivalents. The oxidation of DMFc to  $\text{DMFc}^+$  is also verified with the addition of silver hexafluorophosphate ( $\text{AgPF}_6$ ), which shows the similar color change to green.

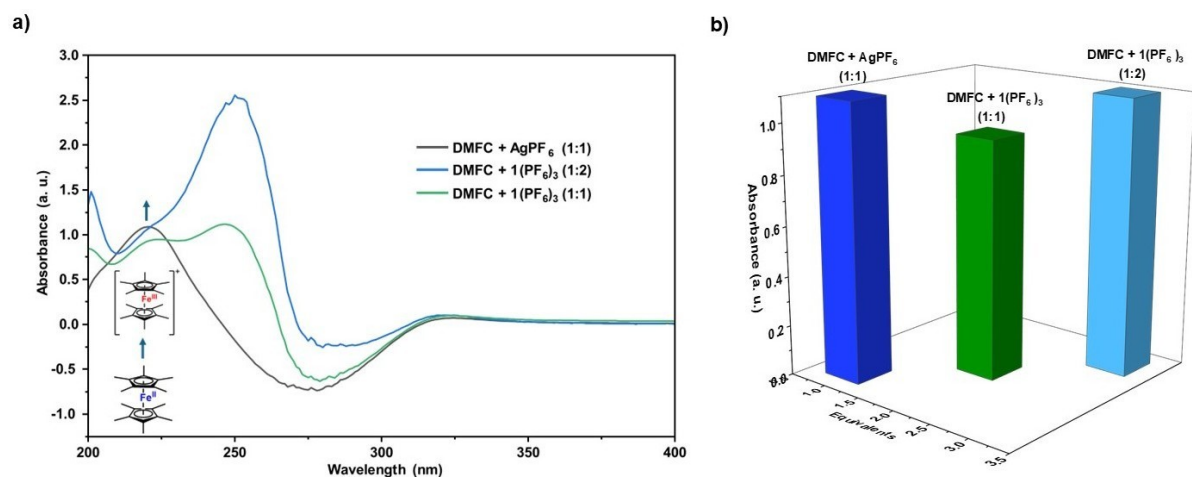

**Figure S23.** a) Monitoring the oxidation of DMFC different equivalents of  $1(\text{PF}_6)_3$  and with silver hexafluorophosphate ( $\text{AgPF}_6$ ) by UV-vis spectroscopy. b) The oxidation of DMFC to  $\text{DMFC}^+$  by  $\text{AgPF}_6$  shows the similar absorbance obtained from the 1:2 mixture of DMFC and  $1(\text{PF}_6)_3$ . Due to some technical errors, the negative absorbance was detected.

## 9. Theoretical calculations

| S. N. | Functions used for calculations              | Ground state energy of the bowl-shaped $[1]^{3+}$ (in HF) | Ground state energy of the planar-shaped $[1]^{3+}$ (in HF) | Energy difference (in HF) | Energy difference (in Kcal/mol) |
|-------|----------------------------------------------|-----------------------------------------------------------|-------------------------------------------------------------|---------------------------|---------------------------------|
| 1     | b3lyp/6-311+g(d,p)<br>(solvent=acetonitrile) | -1258.7300486                                             | -1258.78747984                                              | 0.05743124                | 36.0386                         |

### 9.1 Cartesian Coordinates of TPT

TPT (Stoichiometry:  $\text{C}_{18}\text{H}_{12}\text{N}_6$ )

SCF Done: E = -1021.91339209

-----  
Center Atomic Atomic Coordinates (Angstroms)  
Number Number Type X Y Z  
-----

1 7 0 -0.000000 1.182314 0.682528  
2 7 0 -0.000000 -1.182314 0.682528  
3 7 0 0.000000 -0.000000 -1.365319  
4 7 0 -0.000000 0.000000 5.602814  
5 7 0 0.000000 4.852405 -2.801278

|    |   |   |           |           |           |
|----|---|---|-----------|-----------|-----------|
| 6  | 7 | 0 | -0.000000 | -4.852405 | -2.801278 |
| 7  | 6 | 0 | -0.000000 | 0.000000  | 1.308405  |
| 8  | 6 | 0 | 0.000000  | 1.133181  | -0.654320 |
| 9  | 6 | 0 | -0.000000 | -1.133181 | -0.654320 |
| 10 | 6 | 0 | -0.000000 | 0.000000  | 2.794147  |
| 11 | 6 | 0 | 0.000000  | 2.419916  | -1.397126 |
| 12 | 6 | 0 | -0.000000 | -2.419916 | -1.397126 |
| 13 | 6 | 0 | -0.000000 | 1.197428  | 3.515455  |
| 14 | 6 | 0 | 0.000000  | 2.445976  | -2.794782 |
| 15 | 6 | 0 | 0.000000  | -3.643255 | -0.720687 |
| 16 | 6 | 0 | -0.000000 | -1.197428 | 3.515455  |
| 17 | 6 | 0 | 0.000000  | 3.643255  | -0.720687 |
| 18 | 6 | 0 | -0.000000 | -2.445976 | -2.794782 |
| 19 | 6 | 0 | -0.000000 | 1.140998  | 4.906079  |
| 20 | 6 | 0 | 0.000000  | 3.678557  | -3.441138 |
| 21 | 6 | 0 | 0.000000  | -4.819408 | -1.464782 |
| 22 | 6 | 0 | -0.000000 | -1.140998 | 4.906079  |
| 23 | 6 | 0 | 0.000000  | 4.819408  | -1.464782 |
| 24 | 6 | 0 | -0.000000 | -3.678557 | -3.441138 |
| 25 | 1 | 0 | -0.000000 | 2.146953  | 2.997949  |
| 26 | 1 | 0 | 0.000000  | 1.523073  | -3.358400 |
| 27 | 1 | 0 | -0.000000 | -3.669794 | 0.360383  |
| 28 | 1 | 0 | -0.000000 | -2.146953 | 2.997949  |
| 29 | 1 | 0 | 0.000000  | 3.669794  | 0.360383  |
| 30 | 1 | 0 | -0.000000 | -1.523073 | -3.358400 |
| 31 | 1 | 0 | -0.000000 | 2.057151  | 5.489403  |
| 32 | 1 | 0 | 0.000000  | 3.725737  | -4.526207 |
| 33 | 1 | 0 | 0.000000  | -5.782620 | -0.962960 |
| 34 | 1 | 0 | -0.000000 | -2.057151 | 5.489403  |
| 35 | 1 | 0 | 0.000000  | 5.782620  | -0.962960 |
| 36 | 1 | 0 | -0.000000 | -3.725737 | -4.526207 |

---

## 9.2 Cartesian Coordinates of [1]<sup>3+</sup>

[1]<sup>3+</sup> (Stoichiometry: C<sub>24</sub>H<sub>27</sub>N<sub>6</sub>(3+)) for planar conformation

SCF Done: E = -1258.78747984

| -----  |        |        |                         |           |           |  |
|--------|--------|--------|-------------------------|-----------|-----------|--|
| Center | Atomic | Atomic | Coordinates (Angstroms) |           |           |  |
| Number | Number | Type   | X                       | Y         | Z         |  |
| -----  |        |        |                         |           |           |  |
| 1      | 7      | 0      | -5.378746               | -0.789213 | 0.407638  |  |
| 2      | 6      | 0      | -2.746975               | -0.403098 | -0.319985 |  |
| 3      | 6      | 0      | -1.271478               | -0.186585 | -0.501182 |  |
| 4      | 7      | 0      | -0.512089               | -1.289881 | -0.483205 |  |
| 5      | 6      | 0      | -3.275664               | -1.674688 | -0.181360 |  |
| 6      | 1      | 0      | -2.715821               | -2.444926 | -0.330619 |  |
| 7      | 6      | 0      | -4.592828               | -1.851740 | 0.167325  |  |
| 8      | 1      | 0      | -4.958694               | -2.740607 | 0.240888  |  |
| 9      | 6      | 0      | -6.764895               | -0.992624 | 0.914177  |  |
| 10     | 1      | 0      | -6.785372               | -1.809023 | 1.482713  |  |
| 11     | 6      | 0      | -7.766786               | -1.139760 | -0.212452 |  |
| 12     | 1      | 0      | -8.668543               | -1.272089 | 0.167606  |  |
| 13     | 1      | 0      | -7.761757               | -0.324443 | -0.769730 |  |
| 14     | 7      | 0      | 3.372930                | -4.263425 | 0.407645  |  |
| 15     | 6      | 0      | 1.722575                | -2.177434 | -0.319976 |  |
| 16     | 6      | 0      | 0.797297                | -1.007845 | -0.501175 |  |
| 17     | 7      | 0      | 1.373032                | 0.201472  | -0.483205 |  |
| 18     | 6      | 0      | 3.088091                | -1.999394 | -0.181361 |  |
| 19     | 1      | 0      | 3.475219                | -1.129430 | -0.330629 |  |
| 20     | 6      | 0      | 3.900047                | -3.051568 | 0.167318  |  |
| 21     | 1      | 0      | 4.852745                | -2.923966 | 0.240869  |  |
| 22     | 6      | 0      | 4.242113                | -5.362140 | 0.914180  |  |
| 23     | 1      | 0      | 4.959436                | -4.971645 | 1.482696  |  |
| 24     | 6      | 0      | 4.870543                | -6.156184 | -0.212459 |  |
| 25     | 1      | 0      | 5.436056                | -6.871035 | 0.167583  |  |
| 26     | 1      | 0      | 4.161941                | -6.559530 | -0.769721 |  |
| 27     | 7      | 0      | 2.005881                | 5.052658  | 0.407651  |  |
| 28     | 6      | 0      | 1.024381                | 2.580512  | -0.319980 |  |
| 29     | 6      | 0      | 0.474138                | 1.194400  | -0.501181 |  |
| 30     | 7      | 0      | -0.861075               | 1.088366  | -0.483215 |  |
| 31     | 6      | 0      | 0.187475                | 3.674103  | -0.181367 |  |
| 32     | 1      | 0      | -0.759514               | 3.574394  | -0.330637 |  |

|    |   |   |           |           |           |
|----|---|---|-----------|-----------|-----------|
| 33 | 6 | 0 | 0.692811  | 4.903360  | 0.167316  |
| 34 | 1 | 0 | 0.105900  | 5.664557  | 0.240870  |
| 35 | 6 | 0 | 2.522806  | 6.354798  | 0.914189  |
| 36 | 1 | 0 | 1.826041  | 6.780752  | 1.482713  |
| 37 | 6 | 0 | 2.896390  | 7.295989  | -0.212449 |
| 38 | 1 | 0 | 3.232652  | 8.143187  | 0.167594  |
| 39 | 1 | 0 | 3.599876  | 6.884043  | -0.769722 |
| 40 | 6 | 0 | 1.235167  | -3.465370 | -0.181357 |
| 41 | 1 | 0 | 0.299459  | -3.641956 | -0.330620 |
| 42 | 6 | 0 | 2.072396  | -4.497601 | 0.167321  |
| 43 | 1 | 0 | 1.728945  | -5.395335 | 0.240879  |
| 44 | 1 | 0 | 3.697287  | -5.970232 | 1.482735  |
| 45 | 1 | 0 | 5.425989  | -5.559466 | -0.769730 |
| 46 | 6 | 0 | -3.618705 | 0.662989  | -0.181382 |
| 47 | 1 | 0 | -3.303760 | 1.561595  | -0.330656 |
| 48 | 6 | 0 | -4.931209 | 0.454146  | 0.167300  |
| 49 | 1 | 0 | -5.537029 | 1.200422  | 0.240846  |
| 50 | 1 | 0 | -7.019055 | -0.216687 | 1.482716  |
| 51 | 1 | 0 | -7.527707 | -1.919271 | -0.769702 |
| 52 | 6 | 0 | 2.383471  | 2.802314  | -0.181356 |
| 53 | 1 | 0 | 3.004234  | 2.080260  | -0.330619 |
| 54 | 6 | 0 | 2.858874  | 4.043421  | 0.167328  |
| 55 | 1 | 0 | 3.808064  | 4.194929  | 0.240886  |
| 56 | 1 | 0 | 3.321899  | 6.186944  | 1.482736  |
| 57 | 1 | 0 | 2.101772  | 7.478712  | -0.769709 |

---

## 10. References

1. H. L. Anderson, S. Anderson, J. K. M. Sanders, *J. Chem. Soc., Perkin Trans. 1* **1995**, 2231–2245.
2. (a) SADABS, v 2.05; Bruker AXS Inc.; Madison, WI, 2003; (b) G. M. Sheldrick, SAINT, version 8.37A; Bruker AXS Inc.; Madison, WI, 2013; (c) SMART, v 2.05; Bruker AXS Inc.; Madison, WI, 2003; (d) G. M. Sheldrick, SHELXT - Integrated Space-Group and Crystal Structure Determination. *Acta Crystallogr., Sect. A: Found. Adv.*, **2015**, *71*, 3–8; (e) L. J. Farrugia, WinGX and ORTEP for windows: an update. *J. Appl. Crystallogr.*, **2012**, *45*, 849–854; (f) C. F. Macrae, P. R. Edgington, P. McCabe, E. Pidcock, G. P. Shields, R. Taylor, M. Towler, J. van de Streek, *J. Appl. Crystallogr.*, **2006**, *39*, 453–457.
3. G. M. Sheldrick, *Acta Cryst.*, **2015**, *A71*, 3-8.
4. G. M. Sheldrick, *Acta Cryst.* **2015**, *C71*, 3-8.
5. O. V. Dolomanov, L. J. Bourhis, R. J. Gildea, J. A. K. Howard, H. Puschmann, *J. Appl. Cryst.*, **2009**, *42*, 339-341.
6. BindFit v0.5 | Supramolecular, <https://app.supramolecular.org/bindfit/>
